# Supplementary material for: Protective effects of a herbal combination ( Dimocarpus longan and Orthosiphon stamineus ) on metabolic-associated fatty liver disease via the ERα-PI3K-AKT pathway
Source: Royal Society of Chemistry journal article supplement (doi:10.1039/d5fo05348j), 2026-01-01
Supplement: d5fo05348j4.xlsx [file d5fo05348j4.xlsx]

## Sheet: Monk Fruit
Name	RT [min]	m/z meas.	M meas.	Ions	Molecular Formula	Annotations	AQ	mSigma	Δm/z [mDa]	Δm/z [ppm]	MS/MS score	blank_1_1__[POS]778_[NEG]800	luohanguo_100mg_ml_8_1__[POS]789_[NEG]801
4-Ethoxyphenol	5.49	137.061	138.068	[M-H]-	C8H10O2	Spectral Library - Bruker MetaboBASE Personal Library 3.0, Spectral Library - Bruker MetaboBASE Personal Library 3.0	20020	∞	0.209	1.524	1000	0	1044
L-Pyroglutamic acid	0.66	128.035	129.043	[M-H]-	C5H7NO3	Spectral Library - Bruker NIST 2020 MSMS Spectral Library_hr, Spectral Library - Bruker NIST 2020 MSMS Spectral Library_hr, Spectral Library - Bruker NIST 2020 MSMS Spectral Library_hr	20220	4.7	-0.018	-0.142	1000	0	60643
2-Amino-3-[4-(carboxymethyl)phenyl]propanoic acid	1.75	222.076	223.084	[M-H]-	C11H13NO4	Spectral Library - Bruker NIST 2020 MSMS Spectral Library_hr, Spectral Library - Bruker NIST 2020 MSMS Spectral Library_hr	10120	39.6	-0.719	-3.237	998.8	0	745
3-Hydroxyoctanoic acid	9.56	159.102	160.11	[M-H]-	C8H16O3	Spectral Library - Bruker NIST 2020 MSMS Spectral Library_hr, Spectral Library - Bruker NIST 2020 MSMS Spectral Library_hr	10220	5.2	-0.399	-2.509	998.8	137	15516
Salicylic acid	2.83	137.025	138.032	[M-H]-	C7H6O3	Spectral Library - Bruker NIST 2020 MSMS Spectral Library_hr, Spectral Library - Bruker NIST 2020 MSMS Spectral Library_hr, Spectral Library - Bruker NIST 2020 MSMS Spectral Library_hr, Spectral Library - Bruker NIST 2020 MSMS Spectral Library_hr	20220	15.6	0.106	0.775	998.2	77	7280
N-Acetyltyramine	3.29	178.087	179.095	[M-H]-	C10H13NO2	Spectral Library - Bruker NIST 2020 MSMS Spectral Library_hr, Spectral Library - Bruker NIST 2020 MSMS Spectral Library_hr	20220	10.6	0.111	0.623	997.4	44	3590
Methylmalonic acid	0.91	117.02	118.027	[M-H]-	C4H6O4	Spectral Library - Bruker NIST 2020 MSMS Spectral Library_hr, Spectral Library - Bruker NIST 2020 MSMS Spectral Library_hr, Spectral Library - Bruker NIST 2020 MSMS Spectral Library_hr	20220	7.2	0.213	1.822	997	841	33614
Adenosine	4.14	268.104	267.097	[M+H]+	C10H13N5O4	Spectral Library - Bruker NIST 2020 MSMS Spectral Library_hr, Spectral Library - Bruker NIST 2020 MSMS Spectral Library_hr	20220	10.6	-0.095	-0.354	996.6	236	20246
3-Coumaric acid	4.45	163.04	164.047	[M-H]-	C9H8O3	Spectral Library - Bruker NIST 2020 MSMS Spectral Library_hr, Spectral Library - Bruker NIST 2020 MSMS Spectral Library_hr, Spectral Library - Bruker NIST 2020 MSMS Spectral Library_hr, Spectral Library - Bruker NIST 2020 MSMS Spectral Library_hr	20020	∞	-0.274	-1.682	995.9	0	781
2-Amino-2-ethylbutanoic acid	1.1	132.102	131.095	[M+H]+	C6H13NO2	Spectral Library - Bruker NIST 2020 MSMS Spectral Library_hr, Spectral Library - Bruker NIST 2020 MSMS Spectral Library_hr, Spectral Library - Bruker NIST 2020 MSMS Spectral Library_hr, Spectral Library - Bruker NIST 2020 MSMS Spectral Library_hr, Spectral Library - Bruker NIST 2020 MSMS Spectral Library_hr, Spectral Library - Bruker NIST 2020 MSMS Spectral Library_hr, Spectral Library - Bruker N…	20220	5.3	0.017	0.129	995.7	172	35527
Leu-Leu	6.23	245.186	244.178	[M+H]+, [M-H]-	C12H24N2O3	Spectral Library - Bruker NIST 2020 MSMS Spectral Library_hr, Spectral Library - Bruker NIST 2020 MSMS Spectral Library_hr, Spectral Library - Bruker NIST 2020 MSMS Spectral Library_hr, Spectral Library - Bruker NIST 2020 MSMS Spectral Library_hr, Spectral Library - Bruker NIST 2020 MSMS Spectral Library_hr	20220	6.4	-0.254	-1.034	992.8	0	7609
5-Hydroxy-2-(hydroxymethyl)pyridine	2.03	126.055	125.048	[M+H]+, [M+H-H2O]+	C6H7NO2	Spectral Library - Bruker NIST 2020 MSMS Spectral Library_hr, Spectral Library - Bruker NIST 2020 MSMS Spectral Library_hr, Spectral Library - Bruker NIST 2020 MSMS Spectral Library_hr	20220	2.4	-0.033	-0.259	991.3	0	29785
Val-Leu	4.03	231.17	230.163	[M+H]+	C11H22N2O3	Spectral Library - Bruker NIST 2020 MSMS Spectral Library_hr, Spectral Library - Bruker NIST 2020 MSMS Spectral Library_hr, Spectral Library - Bruker NIST 2020 MSMS Spectral Library_hr	20220	7.7	-0.15	-0.648	990.3	0	4203
5,7-Dihydroxy-2-(4-hydroxyphenyl)-4-oxo-4H-chromen-3-yl 6-deoxyhexopyranosyl-(1->2)-[6-deoxyhexopyranosyl-(1->6)]hexopyranoside	10.65	741.222	740.215	[M+H]+, [M+Na]+, [M-H]-, [M-H-H]2-	C33H40O19	Spectral Library - Bruker NIST 2020 MSMS Spectral Library_hr, Spectral Library - Bruker NIST 2020 MSMS Spectral Library_hr, Spectral Library - Bruker NIST 2020 MSMS Spectral Library_hr, Spectral Library - Bruker NIST 2020 MSMS Spectral Library_hr	10120	21.6	-1.809	-2.44	989.9	0	13947
5-(Hydroxymethyl)-2-furaldehyde	3.04	109.028	126.032	[M+H-H2O]+, [M+H]+	C6H6O3	Spectral Library - Bruker NIST 2020 MSMS Spectral Library_hr, Spectral Library - Bruker NIST 2020 MSMS Spectral Library_hr, Spectral Library - Bruker NIST 2020 MSMS Spectral Library_hr	20220	2.5	-0.12	-1.099	989.4	0	12860
Norharmane	11.51	169.076	168.069	[M+H]+, [M-H]-	C11H8N2	Spectral Library - Bruker NIST 2020 MSMS Spectral Library_hr, Spectral Library - Bruker NIST 2020 MSMS Spectral Library_hr	20220	4.6	-0.202	-1.198	989.2	0	19321
DL-Phenylalanine	2.63	166.086	165.079	[M+H]+	C9H11NO2	Spectral Library - Bruker NIST 2020 MSMS Spectral Library_hr, Spectral Library - Bruker NIST 2020 MSMS Spectral Library_hr, Spectral Library - Bruker NIST 2020 MSMS Spectral Library_hr, Spectral Library - Bruker NIST 2020 MSMS Spectral Library_hr, Spectral Library - Bruker NIST 2020 MSMS Spectral Library_hr	20220	15.7	-0.078	-0.469	984.1	0	20864
3-Hydroxybutyric acid	0.85	103.04	104.047	[M-H]-	C4H8O3	Spectral Library - Bruker NIST 2020 MSMS Spectral Library_hr, Spectral Library - Bruker NIST 2020 MSMS Spectral Library_hr	20220	4.1	-0.163	-1.583	982.4	113	6867
Cyclo(leucylprolyl)	8.77	211.144	210.137	[M+H]+, [M+Na]+	C11H18N2O2	Spectral Library - Bruker NIST 2020 MSMS Spectral Library_hr, Spectral Library - Bruker NIST 2020 MSMS Spectral Library_hr, Spectral Library - Bruker NIST 2020 MSMS Spectral Library_hr	20220	12.5	-0.207	-0.978	977.8	0	8903
Apigenin	12.43	269.045	270.052	[M-H]-	C15H10O5	Spectral Library - Bruker NIST 2020 MSMS Spectral Library_hr, Spectral Library - Bruker NIST 2020 MSMS Spectral Library_hr	10220	5	-0.565	-2.102	977.3	0	16103
5-Hydroxy-2-methylpyridine	7.36	110.06	109.053	[M+H]+	C6H7NO	Spectral Library - Bruker NIST 2020 MSMS Spectral Library_hr, Spectral Library - Bruker NIST 2020 MSMS Spectral Library_hr, Spectral Library - Bruker NIST 2020 MSMS Spectral Library_hr	20220	19.3	-0.07	-0.638	977.1	68	2784
Ethyl 2,4-dihydroxy-6-methylbenzoate	7.04	197.08	196.073	[M+H]+, [M+Na]+	C10H12O4	Spectral Library - Bruker NIST 2020 MSMS Spectral Library_hr, Spectral Library - Bruker NIST 2020 MSMS Spectral Library_hr	10220	15.4	-0.468	-2.373	975.5	0	11898
Leu Leu Ser	4.68	332.218	331.211	[M+H]+	C15H29N3O5	Spectral Library - Bruker MetaboBASE Personal Library 3.0, Spectral Library - Bruker MetaboBASE Personal Library 3.0, Spectral Library - Bruker MetaboBASE Personal Library 3.0, Spectral Library - Bruker MetaboBASE Personal Library 3.0, Spectral Library - Bruker MetaboBASE Personal Library 3.0, Spectral Library - Bruker MetaboBASE Personal Library 3.0	20120	36.1	0.008	0.023	973.1	0	3354
Kaempferitrin	10.95	579.17	578.162	[M+H]+, [M+Cl]-, [M+Na]+, [M-H]-	C27H30O14	Spectral Library - Bruker NIST 2020 MSMS Spectral Library_hr, Spectral Library - Bruker NIST 2020 MSMS Spectral Library_hr	20120	36.6	-1.072	-1.851	973	0	10714
Valylphenylalanine	5.71	265.154	264.147	[M+H]+	C14H20N2O3	Spectral Library - Bruker NIST 2020 MSMS Spectral Library_hr, Spectral Library - Bruker NIST 2020 MSMS Spectral Library_hr, Spectral Library - Bruker NIST 2020 MSMS Spectral Library_hr	20120	45.8	-0.254	-0.96	970.7	0	2385
Citric acid	0.93	191.02	192.027	[M-H]-	C6H8O7	Spectral Library - Bruker NIST 2020 MSMS Spectral Library_hr, Spectral Library - Bruker NIST 2020 MSMS Spectral Library_hr	20220	10.5	-0.019	-0.102	970	0	15611
3-Hydroxy-4-methoxybenzaldehyde	7.46	151.04	152.047	[M-H]-	C8H8O3	Spectral Library - Bruker NIST 2020 MSMS Spectral Library_hr, Spectral Library - Bruker NIST 2020 MSMS Spectral Library_hr, Spectral Library - Bruker NIST 2020 MSMS Spectral Library_hr, Spectral Library - Bruker NIST 2020 MSMS Spectral Library_hr	20020	∞	-0.164	-1.087	970	0	3336
5-(2-Hydroxyethyl)-4-methylthiazole	5.88	144.048	143.04	[M+H]+	C6H9NOS	Spectral Library - Bruker NIST 2020 MSMS Spectral Library_hr, Spectral Library - Bruker NIST 2020 MSMS Spectral Library_hr	20120	57.9	-0.149	-1.033	969.8	0	7628
2-Hydroxypalmitic acid	15.6	271.227	272.234	[M-H]-	C16H32O3	Spectral Library - Bruker NIST 2020 MSMS Spectral Library_hr, Spectral Library - Bruker NIST 2020 MSMS Spectral Library_hr	10220	4.9	-0.674	-2.483	969.1	11452	41192
Ginsenoside Rf	13.53	823.479	800.49	[M+Na]+, [M+HCOOH-H]-, [M-H]-, [M+H]+, [M+Cl]-	C42H72O14	Spectral Library - Bruker NIST 2020 MSMS Spectral Library_hr, Spectral Library - Bruker NIST 2020 MSMS Spectral Library_hr	10220	16.2	-2.058	-2.499	965.3	0	12650
9-OAHSA	16.72	563.503	564.51	[M-H]-	C36H68O4	Spectral Library - Bruker MetaboBASE Personal Library 3.0, Spectral Library - Bruker MetaboBASE Personal Library 3.0	10120	49.5	-1.708	-3.031	964.3	309	8459
Pimelic acid	2.57	159.066	160.073	[M-H]-	C7H12O4	Spectral Library - Bruker NIST 2020 MSMS Spectral Library_hr, Spectral Library - Bruker NIST 2020 MSMS Spectral Library_hr	10020	∞	-0.384	-2.413	963.4	163	852
Ile-Pro	5.04	229.154	228.147	[M+H]+	C11H20N2O3	Spectral Library - Bruker NIST 2020 MSMS Spectral Library_hr, Spectral Library - Bruker NIST 2020 MSMS Spectral Library_hr, Spectral Library - Bruker NIST 2020 MSMS Spectral Library_hr	20220	18.2	-0.253	-1.102	960.4	0	1417
1-Methylcyclohexanol	7.41	97.1011	114.104	[M+H-H2O]+, [M+H]+	C7H14O	Spectral Library - Bruker NIST 2020 MSMS Spectral Library_hr, Spectral Library - Bruker NIST 2020 MSMS Spectral Library_hr, Spectral Library - Bruker NIST 2020 MSMS Spectral Library_hr, Spectral Library - Bruker NIST 2020 MSMS Spectral Library_hr, Spectral Library - Bruker NIST 2020 MSMS Spectral Library_hr, Spectral Library - Bruker NIST 2020 MSMS Spectral Library_hr, Spectral Library - Bruker N…	20020	∞	-0.13	-1.342	959.2	103	2291
N,N'-Diallyl-2,3-dihydroxysuccinamide	2.18	229.118	228.111	[M+H]+	C10H16N2O4	Spectral Library - Bruker NIST 2020 MSMS Spectral Library_hr, Spectral Library - Bruker NIST 2020 MSMS Spectral Library_hr	20020	∞	0.161	0.705	956.7	0	1352
Indole-7-carboxaldehyde	9.08	146.06	145.053	[M+H]+	C9H7NO	Spectral Library - Bruker NIST 2020 MSMS Spectral Library_hr, Spectral Library - Bruker NIST 2020 MSMS Spectral Library_hr, Spectral Library - Bruker NIST 2020 MSMS Spectral Library_hr, Spectral Library - Bruker NIST 2020 MSMS Spectral Library_hr, Spectral Library - Bruker NIST 2020 MSMS Spectral Library_hr, Spectral Library - Bruker NIST 2020 MSMS Spectral Library_hr, Spectral Library - Bruker N…	20220	8.1	-0.127	-0.868	955.3	47	9723
Choline	0.7	104.107	103.1	[M+H]+	C5H13NO	Spectral Library - Bruker MetaboBASE Personal Library 3.0, Spectral Library - Bruker MetaboBASE Personal Library 3.0	20220	2.1	-0.083	-0.798	951.3	0	105478
Methyl linolenate	16.81	293.247	292.24	[M+H]+, [M+Na]+	C19H32O2	Spectral Library - Bruker NIST 2020 MSMS Spectral Library_hr, Spectral Library - Bruker NIST 2020 MSMS Spectral Library_hr, Spectral Library - Bruker NIST 2020 MSMS Spectral Library_hr	20220	14.9	-0.366	-1.247	948	0	17283
4-Hydroxy-N-methylbenzamide	9	150.056	151.063	[M-H]-, [M+H]+	C8H9NO2	Spectral Library - Bruker NIST 2020 MSMS Spectral Library_hr, Spectral Library - Bruker NIST 2020 MSMS Spectral Library_hr	20220	6.6	-0.219	-1.459	944.3	0	8378
6-Methylnicotinic acid	0.72	138.055	137.048	[M+H]+	C7H7NO2	Spectral Library - Bruker NIST 2020 MSMS Spectral Library_hr, Spectral Library - Bruker NIST 2020 MSMS Spectral Library_hr	20220	4.2	0	0	942.8	111	20714
3-Indoleacetic Acid	8.22	176.07	175.063	[M+H]+, [M-H]-, [M+Na]+	C10H9NO2	Spectral Library - Bruker NIST 2020 MSMS Spectral Library_hr, Spectral Library - Bruker NIST 2020 MSMS Spectral Library_hr	20020	∞	-0.232	-1.319	940.3	72	2211
(S)-5'-Deoxy-5'-(methylsulfinyl)adenosine	3.85	314.092	313.084	[M+H]+	C11H15N5O4S	Spectral Library - Bruker MetaboBASE Personal Library 2.0_in-silico, Spectral Library - Bruker MetaboBASE Personal Library 2.0_in-silico	20220	19.8	-0.156	-0.498	939	0	3438
Threonic acid	0.62	135.03	136.037	[M-H]-, [M+CH3COOH-H]-	C4H8O5	Spectral Library - Bruker NIST 2020 MSMS Spectral Library_hr, Spectral Library - Bruker NIST 2020 MSMS Spectral Library_hr	20220	2.3	-0.089	-0.66	933.8	40	60636
4-Pyridinecarboxylic acid	1.1	124.039	123.032	[M+H]+	C6H5NO2	Spectral Library - Bruker NIST 2020 MSMS Spectral Library_hr, Spectral Library - Bruker NIST 2020 MSMS Spectral Library_hr	20220	17.3	0.008	0.065	933.8	72	4106
Phloroacetophenone	1.14	167.035	168.042	[M-H]-	C8H8O4	Spectral Library - Bruker NIST 2020 MSMS Spectral Library_hr, Spectral Library - Bruker NIST 2020 MSMS Spectral Library_hr	20120	1000	-0.326	-1.951	933.4	0	1972
Pinoresinol	11.28	357.134	358.141	[M-H]-	C20H22O6	Spectral Library - Bruker NIST 2020 MSMS Spectral Library_hr, Spectral Library - Bruker NIST 2020 MSMS Spectral Library_hr	20020	∞	-0.62	-1.736	924	0	1464
Pro Gly Leu	4.36	286.176	285.169	[M+H]+	C13H23N3O4	Spectral Library - Bruker MetaboBASE Personal Library 3.0, Spectral Library - Bruker MetaboBASE Personal Library 3.0, Spectral Library - Bruker MetaboBASE Personal Library 3.0	20120	23	-0.039	-0.137	922.1	0	2141
3-((6-O-(6-Deoxy-.alpha.-L-mannopyranosyl)-.beta.-D-glucopyranosyl)oxy)-5-hydroxy-2-(4-hydroxyphenyl)-4-oxo-4H-chromen-7-yl 2-O-(6-deoxy-.alpha.-L-mannopyranosyl)-.beta.-D-glucopyranoside	10.65	903.274	902.267	[M+H]+, [M-H-H]2-, [M+Na]+, [M-H]-	C39H50O24	Spectral Library - Bruker NIST 2020 MSMS Spectral Library_hr, Spectral Library - Bruker NIST 2020 MSMS Spectral Library_hr	10220	6.2	-2.577	-2.853	917.8	0	4049
Ginsenoside A2	13.82	799.482	800.489	[M-H]-, [M+Cl]-, [M+HCOOH-H]-	C42H72O14	Spectral Library - Bruker NIST 2020 MSMS Spectral Library_hr, Spectral Library - Bruker NIST 2020 MSMS Spectral Library_hr	10220	11.5	-2.823	-3.531	915.9	0	2780
4-Pyridoxic acid	1.28	182.046	183.053	[M-H]-	C8H9NO4	Spectral Library - Bruker NIST 2020 MSMS Spectral Library_hr, Spectral Library - Bruker NIST 2020 MSMS Spectral Library_hr	20020	∞	-0.34	-1.865	915.5	0	1344
(Z)-9,12,13-Trihydroxyoctadec-15-enoic acid	13.02	329.233	330.24	[M-H]-	C18H34O5	Spectral Library - Bruker NIST 2020 MSMS Spectral Library_hr, Spectral Library - Bruker NIST 2020 MSMS Spectral Library_hr	20220	7.7	-0.356	-1.081	910.7	142	5784
3-[5-(2-Methylpropyl)-3,6-dioxopiperazin-2-yl]propanoic acid	4.18	243.134	242.126	[M+H]+	C11H18N2O4	Spectral Library - Bruker NIST 2020 MSMS Spectral Library_hr, Spectral Library - Bruker NIST 2020 MSMS Spectral Library_hr	20220	9	-0.153	-0.63	910	0	3446
4-Nitrosodiphenylamine	11.23	199.086	198.079	[M+H]+, [M-H]-	C12H10N2O	Spectral Library - Bruker NIST 2020 MSMS Spectral Library_hr, Spectral Library - Bruker NIST 2020 MSMS Spectral Library_hr	20120	25.8	-0.206	-1.037	909.7	0	7299
2'-O-Methyladenosine	5.29	282.12	281.112	[M+H]+	C11H15N5O4	Spectral Library - Bruker NIST 2020 MSMS Spectral Library_hr, Spectral Library - Bruker NIST 2020 MSMS Spectral Library_hr	20020	∞	-0.155	-0.549	905.7	0	1658
Loliolide	9.45	197.117	196.109	[M+H]+, [M-H]-	C11H16O3	Spectral Library - Bruker NIST 2020 MSMS Spectral Library_hr, Spectral Library - Bruker NIST 2020 MSMS Spectral Library_hr	10220	16.1	-0.492	-2.496	900.3	0	8063
Adenine	1.96	136.062	135.054	[M+H]+	C5H5N5	Spectral Library - Bruker NIST 2020 MSMS Spectral Library_hr, Spectral Library - Bruker NIST 2020 MSMS Spectral Library_hr	20010	∞	-0.004	-0.026	899	75	2920
FruLeuIle	9.36	407.238	406.231	[M+H]+, [M+H-H2O]+	C18H34N2O8	Spectral Library - MoNA-export-GNPS.msp, Spectral Library - MoNA-export-GNPS.msp	20210	8.6	-0.805	-1.978	896.1	0	28528
9-PAHSA	16.68	537.488	538.495	[M-H]-	C34H66O4	Spectral Library - Bruker MetaboBASE Personal Library 3.0, Spectral Library - Bruker MetaboBASE Personal Library 3.0, Spectral Library - Bruker MetaboBASE Personal Library 3.0	20210	16.7	-0.79	-1.47	890.8	1955	11822
Sucrose	0.77	387.114	342.116	[M+HCOOH-H]-, [M+K]+, [M+Na]+, [M-H]-	C12H22O11	Spectral Library - Bruker NIST 2020 MSMS Spectral Library_hr, Spectral Library - Bruker NIST 2020 MSMS Spectral Library_hr, Spectral Library - Bruker NIST 2020 MSMS Spectral Library_hr, Spectral Library - Bruker NIST 2020 MSMS Spectral Library_hr, Spectral Library - Bruker NIST 2020 MSMS Spectral Library_hr, Spectral Library - Bruker NIST 2020 MSMS Spectral Library_hr, Spectral Library - Bruker N…	20110	25.2	-0.219	-0.565	890.3	1850	10318
D-Arabinono-1,4-lactone	0.7	147.03	148.037	[M-H]-, [M+HCOOH-H]-	C5H8O5	Spectral Library - Bruker MetaboBASE Personal Library 3.0, Spectral Library - Bruker MetaboBASE Personal Library 3.0	20210	6.7	-0.11	-0.749	883.3	0	16757
5-Tetradecynoic acid	15.22	223.17	224.177	[M-H]-, [M+H]+	C14H24O2	Spectral Library - Bruker NIST 2020 MSMS Spectral Library_hr, Spectral Library - Bruker NIST 2020 MSMS Spectral Library_hr	20210	9.6	-0.245	-1.098	881.7	150	8086
DL-Leu-DL-Val	2.86	231.17	230.163	[M+H]+	C11H22N2O3	Spectral Library - Bruker NIST 2020 MSMS Spectral Library_hr, Spectral Library - Bruker NIST 2020 MSMS Spectral Library_hr, Spectral Library - Bruker NIST 2020 MSMS Spectral Library_hr, Spectral Library - Bruker NIST 2020 MSMS Spectral Library_hr, Spectral Library - Bruker NIST 2020 MSMS Spectral Library_hr	20010	∞	-0.143	-0.62	876.9	0	1248
4'-Hydroxy-2'-methyl-3,4,5-trimethoxychalcone	10.81	327.123	328.131	[M-H]-, [M+H-H2O]+, [M+H]+	C19H20O5	Spectral Library - Bruker NIST 2020 MSMS Spectral Library_hr, Spectral Library - Bruker NIST 2020 MSMS Spectral Library_hr	20110	22.9	-0.488	-1.492	864.9	0	2184
Aegineoside	8.29	533.166	534.173	[M-H]-	C26H30O12	Spectral Library - Bruker NIST 2020 MSMS Spectral Library_hr, Spectral Library - Bruker NIST 2020 MSMS Spectral Library_hr	20110	39.4	-0.814	-1.526	864	0	3766
L-Gulono-1,4-lactone	0.7	177.04	178.047	[M-H]-	C6H10O6	Spectral Library - Bruker NIST 2020 MSMS Spectral Library_hr, Spectral Library - Bruker NIST 2020 MSMS Spectral Library_hr, Spectral Library - Bruker NIST 2020 MSMS Spectral Library_hr	20210	14.1	-0.267	-1.511	860.9	46	5130
Tetrahydroharman-3-carboxylic acid	5.89	231.113	230.105	[M+H]+	C13H14N2O2	Spectral Library - Bruker NIST 2020 MSMS Spectral Library_hr, Spectral Library - Bruker NIST 2020 MSMS Spectral Library_hr	20110	23.8	-0.082	-0.356	860.8	0	6647
2-Indolinone	7.2	134.06	133.053	[M+H]+	C8H7NO	Spectral Library - Bruker NIST 2020 MSMS Spectral Library_hr, Spectral Library - Bruker NIST 2020 MSMS Spectral Library_hr, Spectral Library - Bruker NIST 2020 MSMS Spectral Library_hr, Spectral Library - Bruker NIST 2020 MSMS Spectral Library_hr	20210	13.1	-0.095	-0.711	859.6	0	11272
3',4'-Dimethoxy-3-hydroxy-6-methylflavone	10.71	311.091	312.098	[M-H]-	C18H16O5	Spectral Library - Bruker NIST 2020 MSMS Spectral Library_hr, Spectral Library - Bruker NIST 2020 MSMS Spectral Library_hr, Spectral Library - Bruker NIST 2020 MSMS Spectral Library_hr, Spectral Library - Bruker NIST 2020 MSMS Spectral Library_hr	10110	24.8	-1.533	-4.929	858.2	0	1531
Tetraphyllin B	3.46	288.108	287.1	[M+H]+	C12H17NO7	Spectral Library - Bruker MetaboBASE Personal Library 2.0_in-silico, Spectral Library - Bruker MetaboBASE Personal Library 2.0_in-silico, Spectral Library - Bruker MetaboBASE Personal Library 2.0_in-silico	20010	∞	-0.106	-0.368	850.4	0	3996
4-Pyridinylacetic acid	6.06	138.055	137.048	[M+H]+	C7H7NO2	Spectral Library - Bruker NIST 2020 MSMS Spectral Library_hr, Spectral Library - Bruker NIST 2020 MSMS Spectral Library_hr, Spectral Library - Bruker NIST 2020 MSMS Spectral Library_hr, Spectral Library - Bruker NIST 2020 MSMS Spectral Library_hr, Spectral Library - Bruker NIST 2020 MSMS Spectral Library_hr, Spectral Library - Bruker NIST 2020 MSMS Spectral Library_hr, Spectral Library - Bruker N…	20010	∞	-0.063	-0.459	847.9	144	2168
2-Amino-4'-methoxyacetophenone	5.71	166.086	165.079	[M+H]+	C9H11NO2	Spectral Library - Bruker NIST 2020 MSMS Spectral Library_hr, Spectral Library - Bruker NIST 2020 MSMS Spectral Library_hr, Spectral Library - Bruker NIST 2020 MSMS Spectral Library_hr, Spectral Library - Bruker NIST 2020 MSMS Spectral Library_hr, Spectral Library - Bruker NIST 2020 MSMS Spectral Library_hr	20010	∞	-0.329	-1.983	845	139	1380
Nalidixic acid	6.99	233.092	232.085	[M+H]+	C12H12N2O3	Spectral Library - Bruker NIST 2020 MSMS Spectral Library_hr, Spectral Library - Bruker NIST 2020 MSMS Spectral Library_hr, Spectral Library - Bruker NIST 2020 MSMS Spectral Library_hr, Spectral Library - Bruker NIST 2020 MSMS Spectral Library_hr	20210	10.5	0.048	0.207	840.8	0	4708
(2S)-2-{[1-(R)-Carboxyethyl]amino}pentanoate	1.3	190.107	189.1	[M+H]+	C8H15NO4	Spectral Library - Bruker MetaboBASE Personal Library 2.0_in-silico, Spectral Library - Bruker MetaboBASE Personal Library 2.0_in-silico, Spectral Library - Bruker MetaboBASE Personal Library 2.0_in-silico	20210	13.8	0.014	0.075	837.1	55	5900
Myo-Inositol, 1,2-anhydro-	0.73	161.046	162.053	[M-H]-	C6H10O5	Spectral Library - Bruker NIST 2020 MSMS Spectral Library_hr, Spectral Library - Bruker NIST 2020 MSMS Spectral Library_hr, Spectral Library - Bruker NIST 2020 MSMS Spectral Library_hr	20010	∞	0.181	1.121	828	616	7951
Gly Ile Phe	8.87	336.191	335.184	[M+H]+	C17H25N3O4	Spectral Library - Bruker MetaboBASE Personal Library 3.0, Spectral Library - Bruker MetaboBASE Personal Library 3.0, Spectral Library - Bruker MetaboBASE Personal Library 3.0, Spectral Library - Bruker MetaboBASE Personal Library 3.0, Spectral Library - Bruker MetaboBASE Personal Library 3.0, Spectral Library - Bruker MetaboBASE Personal Library 3.0, Spectral Library - Bruker MetaboBASE Personal…	20110	21.2	-0.467	-1.39	826.4	0	1950
L-DOPA methyl ester	5.4	210.077	211.084	[M-H]-	C10H13NO4	Spectral Library - Bruker NIST 2020 MSMS Spectral Library_hr, Spectral Library - Bruker NIST 2020 MSMS Spectral Library_hr	20210	15.2	0.002	0.007	824.7	0	2285
NCGC00384752-01!5,7-dihydroxy-2-(4-hydroxyphenyl)-6,8-bis[3,4,5-trihydroxy-6-(hydroxymethyl)oxan-2-yl]-2,3-dihydrochromen-4-one	7.48	595.165	596.172	[M-H]-	C27H32O15	Spectral Library - MoNA-export-GNPS.msp, Spectral Library - MoNA-export-GNPS.msp	10210	16.5	-1.725	-2.899	822.3	0	2665
Methyl DL-pyroglutamate	3.03	144.065	143.058	[M+H]+	C6H9NO3	Spectral Library - Bruker NIST 2020 MSMS Spectral Library_hr, Spectral Library - Bruker NIST 2020 MSMS Spectral Library_hr, Spectral Library - Bruker NIST 2020 MSMS Spectral Library_hr, Spectral Library - Bruker NIST 2020 MSMS Spectral Library_hr	20210	16.7	-0.058	-0.402	821.7	111	12061
(4-(.beta.-D-Glucopyranosyloxy)phenyl)acetic acid	1.43	313.093	314.1	[M-H]-	C14H18O8	Spectral Library - Bruker NIST 2020 MSMS Spectral Library_hr, Spectral Library - Bruker NIST 2020 MSMS Spectral Library_hr	20010	∞	-0.325	-1.039	818.8	0	1003
2-Methyl-3-pyridinol	1.89	110.06	109.053	[M+H]+	C6H7NO	Spectral Library - Bruker NIST 2020 MSMS Spectral Library_hr, Spectral Library - Bruker NIST 2020 MSMS Spectral Library_hr, Spectral Library - Bruker NIST 2020 MSMS Spectral Library_hr	20010	∞	-0.079	-0.715	817.7	51	2126
N-[1-(2-methoxyethyl)-2-oxo-3,4-dihydroquinolin-6-yl]furan-2-carboxamide	12.26	315.133	314.126	[M+H]+	C17H18N2O4	Spectral Library - Bruker MetaboBASE Personal Library 3.0, Spectral Library - Bruker MetaboBASE Personal Library 3.0, Spectral Library - Bruker MetaboBASE Personal Library 3.0, Spectral Library - Bruker MetaboBASE Personal Library 3.0	20110	31.6	-0.496	-1.574	815.5	0	2882
3-Hydroxybenzaldehyde	6.2	121.029	122.037	[M-H]-	C7H6O2	Spectral Library - Bruker NIST 2020 MSMS Spectral Library_hr, Spectral Library - Bruker NIST 2020 MSMS Spectral Library_hr	20210	3.3	-0.135	-1.112	814.2	0	19041
4-(Hexopyranosyloxy)-3-methoxybenzoic acid	1.02	329.088	330.095	[M-H]-	C14H18O9	Spectral Library - Bruker NIST 2020 MSMS Spectral Library_hr, Spectral Library - Bruker NIST 2020 MSMS Spectral Library_hr	20110	50.6	-0.065	-0.197	810.6	0	1339
Darendoside A	6.72	431.154	432.162	[M-H]-	C19H28O11	Spectral Library - Bruker NIST 2020 MSMS Spectral Library_hr, Spectral Library - Bruker NIST 2020 MSMS Spectral Library_hr, Spectral Library - Bruker NIST 2020 MSMS Spectral Library_hr	10010	∞	-1.468	-3.404	807.9	0	1080
2-Oxo-2,3-dihydro-3-pyridinecarboxylic acid	1.16	138.019	139.027	[M-H]-	C6H5NO3	Spectral Library - Bruker NIST 2020 MSMS Spectral Library_hr, Spectral Library - Bruker NIST 2020 MSMS Spectral Library_hr, Spectral Library - Bruker NIST 2020 MSMS Spectral Library_hr, Spectral Library - Bruker NIST 2020 MSMS Spectral Library_hr, Spectral Library - Bruker NIST 2020 MSMS Spectral Library_hr, Spectral Library - Bruker NIST 2020 MSMS Spectral Library_hr, Spectral Library - Bruker N…	20110	31	-0.245	-1.778	797.3	81	964
Hexyl 6-O-pentopyranosylhexopyranoside	10.94	395.191	396.199	[M-H]-	C17H32O10	Spectral Library - Bruker NIST 2020 MSMS Spectral Library_hr, Spectral Library - Bruker NIST 2020 MSMS Spectral Library_hr	10110	40.6	-0.851	-2.154	773.1	0	1469
9(S)-HpODE	17.18	311.223	312.23	[M-H]-	C18H32O4	Spectral Library - Bruker MetaboBASE Personal Library 3.0, Spectral Library - Bruker MetaboBASE Personal Library 3.0, Spectral Library - Bruker MetaboBASE Personal Library 3.0, Spectral Library - Bruker MetaboBASE Personal Library 3.0	20010	∞	-0.218	-0.701	772.4	0	512
2-(Hydroxymethyl)-6-methylpyridin-3-ol	7.85	138.056	139.063	[M-H]-	C7H9NO2	Spectral Library - Bruker NIST 2020 MSMS Spectral Library_hr, Spectral Library - Bruker NIST 2020 MSMS Spectral Library_hr	20010	∞	-0.03	-0.221	769.3	0	683
Phenacetin	12.08	180.102	179.094	[M+H]+	C10H13NO2	Spectral Library - Bruker NIST 2020 MSMS Spectral Library_hr, Spectral Library - Bruker NIST 2020 MSMS Spectral Library_hr	20010	∞	-0.322	-1.789	765.6	0	3361
3-Furancarboxylic acid	0.83	111.009	112.016	[M-H]-	C5H4O3	Spectral Library - Bruker NIST 2020 MSMS Spectral Library_hr, Spectral Library - Bruker NIST 2020 MSMS Spectral Library_hr, Spectral Library - Bruker NIST 2020 MSMS Spectral Library_hr	20210	4.6	0.033	0.3	758.3	79	12666
PyroGlu-Phe	5.24	277.118	276.111	[M+H]+	C14H16N2O4	Spectral Library - Bruker NIST 2020 MSMS Spectral Library_hr, Spectral Library - Bruker NIST 2020 MSMS Spectral Library_hr	20210	12.3	-0.221	-0.796	753.6	0	2441
5-Nitro-2-(3-phenylpropylamino)benzoic acid	11.64	301.117	300.11	[M+H]+	C16H16N2O4	Spectral Library - Bruker NIST 2020 MSMS Spectral Library_hr, Spectral Library - Bruker NIST 2020 MSMS Spectral Library_hr	10210	13.3	-0.858	-2.851	744.2	0	5269
Pantothenic Acid	1.59	218.103	219.111	[M-H]-	C9H17NO5	Spectral Library - Bruker NIST 2020 MSMS Spectral Library_hr, Spectral Library - Bruker NIST 2020 MSMS Spectral Library_hr	20010	∞	-0.012	-0.056	742.3	0	643
Pinolenic Acid	15.97	277.217	278.224	[M-H]-	C18H30O2	Spectral Library - Bruker NIST 2020 MSMS Spectral Library_hr, Spectral Library - Bruker NIST 2020 MSMS Spectral Library_hr	10210	16.3	-0.667	-2.407	741.8	1845	65674
DL-Malic acid	0.59	133.014	134.021	[M-H]-, [M-H-H2O]-	C4H6O5	Spectral Library - Bruker NIST 2020 MSMS Spectral Library_hr, Spectral Library - Bruker NIST 2020 MSMS Spectral Library_hr, Spectral Library - Bruker NIST 2020 MSMS Spectral Library_hr	20210	6.6	-0.016	-0.119	739.6	0	101804
FRAXETIN	7.94	209.044	208.037	[M+H]+	C10H8O5	Spectral Library - Bruker NIST 2020 MSMS Spectral Library_hr, Spectral Library - Bruker NIST 2020 MSMS Spectral Library_hr	20010	∞	-0.134	-0.641	734	0	1962
2-(1',2',3',4'-Tetrahydroxybutyl)quinoxaline	7.89	251.102	250.095	[M+H]+	C12H14N2O4	Spectral Library - Bruker NIST 2020 MSMS Spectral Library_hr, Spectral Library - Bruker NIST 2020 MSMS Spectral Library_hr	20110	34.4	-0.187	-0.746	725.9	0	1942
PyroGlu-Val	1.98	227.103	228.111	[M-H]-	C10H16N2O4	Spectral Library - Bruker NIST 2020 MSMS Spectral Library_hr, Spectral Library - Bruker NIST 2020 MSMS Spectral Library_hr	20110	75	-0.259	-1.14	719.5	0	923
Resveratrol	11.35	211.075	228.078	[M+H-H2O]+, [M+Na]+, [M+H]+	C14H12O3	Spectral Library - Bruker NIST 2020 MSMS Spectral Library_hr, Spectral Library - Bruker NIST 2020 MSMS Spectral Library_hr, Spectral Library - Bruker NIST 2020 MSMS Spectral Library_hr	10210	6.2	-0.463	-2.194	718.5	49	22119
Flazine	11.03	309.086	308.079	[M+H]+, [M+Na]+	C17H12N2O4	Spectral Library - Bruker MetaboBASE Personal Library 2.0_in-silico, Spectral Library - Bruker MetaboBASE Personal Library 2.0_in-silico	20210	10.8	-0.555	-1.794	712.1	0	28678
3-Hydroxy-4-methoxycinnamic acid (isoferulic acid)	5.56	193.051	194.058	[M-H]-	C10H10O4	Spectral Library - Bruker Sumner MetaboBASE Plant Library - confirmed standards, Spectral Library - Bruker Sumner MetaboBASE Plant Library - confirmed standards	10010	∞	0.535	2.774	708.8	0	1335
Isopalmitic acid	18.09	255.232	256.24	[M-H]-	C16H32O2	Spectral Library - Bruker MetaboBASE Personal Library 3.0, Spectral Library - Bruker MetaboBASE Personal Library 3.0	10110	43.9	-0.649	-2.542	702.6	0	22698
2-Hydroxybenzamide	6.14	136.04	137.048	[M-H]-	C7H7NO2	Spectral Library - Bruker NIST 2020 MSMS Spectral Library_hr, Spectral Library - Bruker NIST 2020 MSMS Spectral Library_hr	20010	∞	-0.155	-1.138	701.1	0	1411
4-Acetyl-L-phenylalanine	10.47	208.097	207.089	[M+H]+, [M+Na]+	C11H13NO3	Spectral Library - Bruker NIST 2020 MSMS Spectral Library_hr, Spectral Library - Bruker NIST 2020 MSMS Spectral Library_hr, Spectral Library - Bruker NIST 2020 MSMS Spectral Library_hr	20210	4.3	-0.293	-1.409	694.1	0	35622
Benzyl 6-O-(4-carboxy-3-hydroxy-3-methylbutanoyl)-.beta.-D-glucopyranoside	6.9	413.146	414.153	[M-H]-	C19H26O10	Spectral Library - Bruker NIST 2020 MSMS Spectral Library_hr, Spectral Library - Bruker NIST 2020 MSMS Spectral Library_hr, Spectral Library - Bruker NIST 2020 MSMS Spectral Library_hr	20110	44.5	0.299	0.725	684.7	0	614
8-Methoxyabruquinone A	7.25	413.12	390.131	[M+Na]+, [M-H]-, [M+H-H2O]+	C20H22O8	Spectral Library - Bruker NIST 2020 MSMS Spectral Library_hr, Spectral Library - Bruker NIST 2020 MSMS Spectral Library_hr	20210	4.3	-0.427	-1.034	683.5	0	4741
Phenylacetic acid	6.12	137.06	136.052	[M+H]+	C8H8O2	Spectral Library - Bruker NIST 2020 MSMS Spectral Library_hr, Spectral Library - Bruker NIST 2020 MSMS Spectral Library_hr, Spectral Library - Bruker NIST 2020 MSMS Spectral Library_hr	20010	∞	-0.071	-0.519	678.7	0	2945
Verbasoside	4.63	461.165	462.173	[M-H]-	C20H30O12	Spectral Library - Bruker NIST 2020 MSMS Spectral Library_hr, Spectral Library - Bruker NIST 2020 MSMS Spectral Library_hr	10110	33.2	-1.204	-2.612	670.1	0	2093
Acetyl-L-tyrosine	3.32	222.078	223.085	[M-H]-	C11H13NO4	Spectral Library - Bruker MetaboBASE Personal Library 3.0, Spectral Library - Bruker MetaboBASE Personal Library 3.0	20010	∞	0.336	1.515	668.2	0	1588
L-Phenylalanine	2.53	164.071	165.079	[M-H]-	C9H11NO2	Spectral Library - Bruker NIST 2020 MSMS Spectral Library_hr, Spectral Library - Bruker NIST 2020 MSMS Spectral Library_hr, Spectral Library - Bruker NIST 2020 MSMS Spectral Library_hr	20210	9.5	-0.304	-1.853	667.4	0	1527
Oxyresveratrol	9.85	227.07	244.073	[M+H-H2O]+, [M+Na]+, [M-H]-	C14H12O4	Spectral Library - Bruker NIST 2020 MSMS Spectral Library_hr, Spectral Library - Bruker NIST 2020 MSMS Spectral Library_hr	20110	28.8	-0.348	-1.534	667.3	0	8715
Siamenoside I	12.91	1123.59	1124.6	[M-H]-, [M+HCOOH-H]-, [M+Cl]-	C54H92O24	Spectral Library - Bruker NIST 2020 MSMS Spectral Library_hr, Spectral Library - Bruker NIST 2020 MSMS Spectral Library_hr	10210	12.8	-3.426	-3.049	666.7	0	15513
2'-Hydroxy-5'-methoxyacetophenone	7.11	165.055	166.063	[M-H]-	C9H10O3	Spectral Library - Bruker NIST 2020 MSMS Spectral Library_hr, Spectral Library - Bruker NIST 2020 MSMS Spectral Library_hr, Spectral Library - Bruker NIST 2020 MSMS Spectral Library_hr, Spectral Library - Bruker NIST 2020 MSMS Spectral Library_hr	20110	1000	-0.281	-1.704	666.2	0	574
3-Hydroxy-2-methylbenzoic acid	2.28	151.04	152.047	[M-H]-	C8H8O3	Spectral Library - Bruker NIST 2020 MSMS Spectral Library_hr, Spectral Library - Bruker NIST 2020 MSMS Spectral Library_hr	20010	∞	-0.257	-1.703	665.5	0	1253
2-(3-Hydroxypropyl)-1H-isoindole-1,3(2H)-dione	8.37	206.082	205.075	[M+H]+	C11H11NO3	Spectral Library - Bruker NIST 2020 MSMS Spectral Library_hr, Spectral Library - Bruker NIST 2020 MSMS Spectral Library_hr, Spectral Library - Bruker NIST 2020 MSMS Spectral Library_hr	10010	∞	0.604	2.931	659.9	0	1681
1,2,3,4,5,6-Hexahydro-5-(1-hydroxyethylidene)-7H-cyclopenta[b]pyridin-7-one	8.3	180.102	179.094	[M+H]+, [M+H-H2O]+	C10H13NO2	Spectral Library - Bruker MetaboBASE Personal Library 2.0_in-silico, Spectral Library - Bruker MetaboBASE Personal Library 2.0_in-silico, Spectral Library - Bruker MetaboBASE Personal Library 2.0_in-silico, Spectral Library - Bruker MetaboBASE Personal Library 2.0_in-silico, Spectral Library - Bruker MetaboBASE Personal Library 2.0_in-silico, Spectral Library - Bruker MetaboBASE Personal Library …	20210	12	-0.227	-1.26	655.3	0	11849
2-Methoxy-1,4-benzenediol	7.32	141.055	140.047	[M+H]+	C7H8O3	Spectral Library - Bruker NIST 2020 MSMS Spectral Library_hr, Spectral Library - Bruker NIST 2020 MSMS Spectral Library_hr, Spectral Library - Bruker NIST 2020 MSMS Spectral Library_hr	20210	9.6	-0.006	-0.046	651.8	0	7767
3-Methyl-2-oxovaleric acid	2.47	129.056	130.063	[M-H]-	C6H10O3	Spectral Library - Bruker MetaboBASE Personal Library 3.0, Spectral Library - Bruker MetaboBASE Personal Library 3.0	20010	∞	0.068	0.526	638.5	99	3119
11-Oxomogroside V	12.25	1283.62	1284.63	[M-H]-, [M+H]+, [M-H-H]2-	C60H100O29	Spectral Library - Bruker NIST 2020 MSMS Spectral Library_hr, Spectral Library - Bruker NIST 2020 MSMS Spectral Library_hr	10110	66.9	-3.713	-2.892	638.4	0	7141
methyl 6-fluoro-4-(2-hydroxyethylamino)-2-oxo-1H-quinoline-3-carboxylate	12.78	281.092	280.085	[M+H]+	C13H13FN2O4	Spectral Library - Bruker MetaboBASE Personal Library 3.0, Spectral Library - Bruker MetaboBASE Personal Library 3.0	10110	65.7	-1.393	-4.956	633.6	0	3553
N-Ethylglycine	0.78	104.07	103.063	[M+H]+	C4H9NO2	Spectral Library - Bruker MetaboBASE Personal Library 2.0_in-silico, Spectral Library - Bruker MetaboBASE Personal Library 2.0_in-silico, Spectral Library - Bruker MetaboBASE Personal Library 2.0_in-silico, Spectral Library - Bruker MetaboBASE Personal Library 2.0_in-silico, Spectral Library - Bruker MetaboBASE Personal Library 2.0_in-silico, Spectral Library - Bruker MetaboBASE Personal Library …	20010	∞	-0.147	-1.416	633.4	50	1051
METHYL-BETA-CARBOLINE-3-CARBOXYLATE	12.51	227.082	226.074	[M+H]+	C13H10N2O2	Spectral Library - Bruker MetaboBASE Personal Library 3.0, Spectral Library - Bruker MetaboBASE Personal Library 3.0	20110	20.3	0.076	0.333	627.5	0	4793
2-Hydroxy-4-methoxybenzaldehyde	4.57	151.04	152.047	[M-H]-	C8H8O3	Spectral Library - Bruker NIST 2020 MSMS Spectral Library_hr, Spectral Library - Bruker NIST 2020 MSMS Spectral Library_hr, Spectral Library - Bruker NIST 2020 MSMS Spectral Library_hr, Spectral Library - Bruker NIST 2020 MSMS Spectral Library_hr	20210	10	-0.038	-0.254	622.3	0	1095
Vanillic acid	2.57	167.035	168.042	[M-H]-	C8H8O4	Spectral Library - Bruker Sumner MetaboBASE Plant Library - confirmed standards, Spectral Library - Bruker Sumner MetaboBASE Plant Library - confirmed standards	10210	7	-0.347	-2.078	616.2	0	5166
5-{[(5-Methyl-2-furyl)methyl]amino}-5-oxopentanoic acid	6.46	224.092	225.1	[M-H]-	C11H15NO4	Spectral Library - Bruker NIST 2020 MSMS Spectral Library_hr, Spectral Library - Bruker NIST 2020 MSMS Spectral Library_hr	20010	∞	-0.387	-1.727	612.1	0	1914
Itaconic acid	0.67	129.019	130.026	[M-H]-	C5H6O4	Spectral Library - Bruker NIST 2020 MSMS Spectral Library_hr, Spectral Library - Bruker NIST 2020 MSMS Spectral Library_hr, Spectral Library - Bruker NIST 2020 MSMS Spectral Library_hr, Spectral Library - Bruker NIST 2020 MSMS Spectral Library_hr	20010	∞	-0.173	-1.337	609.1	93	4968
MOGROSIDE V	12.55	1285.64	1286.65	[M-H]-	C60H102O29	Spectral Library - Bruker NIST 2020 MSMS Spectral Library_hr, Spectral Library - Bruker NIST 2020 MSMS Spectral Library_hr	10210	9.1	-3.099	-2.411	609	0	7609
HBOA	1.63	166.05	165.043	[M+H]+	C8H7NO3	Spectral Library - Bruker MetaboBASE Personal Library 2.0_in-silico, Spectral Library - Bruker MetaboBASE Personal Library 2.0_in-silico	20010	∞	-0.038	-0.231	605.6	70	1192
Leu-Phe	7.93	279.17	278.163	[M+H]+	C15H22N2O3	Spectral Library - Bruker NIST 2020 MSMS Spectral Library_hr, Spectral Library - Bruker NIST 2020 MSMS Spectral Library_hr, Spectral Library - Bruker NIST 2020 MSMS Spectral Library_hr	20110	44.5	-0.457	-1.638	604.8	0	1762
Quinolin-7-ol	9.12	144.045	145.053	[M-H]-	C9H7NO	Spectral Library - Bruker NIST 2020 MSMS Spectral Library_hr, Spectral Library - Bruker NIST 2020 MSMS Spectral Library_hr, Spectral Library - Bruker NIST 2020 MSMS Spectral Library_hr, Spectral Library - Bruker NIST 2020 MSMS Spectral Library_hr, Spectral Library - Bruker NIST 2020 MSMS Spectral Library_hr, Spectral Library - Bruker NIST 2020 MSMS Spectral Library_hr	20210	9.6	-0.164	-1.137	600.7	0	11018
Di-2-furanylmethane	7.97	149.06	148.052	[M+H]+	C9H8O2	Spectral Library - Bruker MetaboBASE Personal Library 2.0_in-silico, Spectral Library - Bruker MetaboBASE Personal Library 2.0_in-silico, Spectral Library - Bruker MetaboBASE Personal Library 2.0_in-silico	20210	15.7	-0.132	-0.887	589.4	94	2827
Baycarb	11.67	208.133	207.126	[M+H]+	C12H17NO2	Spectral Library - Bruker NIST 2020 MSMS Spectral Library_hr, Spectral Library - Bruker NIST 2020 MSMS Spectral Library_hr, Spectral Library - Bruker NIST 2020 MSMS Spectral Library_hr	20210	6.2	-0.309	-1.484	589.1	0	36154
9-SAHSA	16.73	565.519	566.526	[M-H]-	C36H70O4	Spectral Library - Bruker MetaboBASE Personal Library 3.0, Spectral Library - Bruker MetaboBASE Personal Library 3.0, Spectral Library - Bruker MetaboBASE Personal Library 3.0	10110	69.1	-1.635	-2.892	586.5	900	4710
Stearolic acid	16.26	279.232	280.24	[M-H]-	C18H32O2	Spectral Library - Bruker MetaboBASE Personal Library 3.0, Spectral Library - Bruker MetaboBASE Personal Library 3.0	20210	3.4	-0.514	-1.841	568.1	4570	405810
2-Hydroxy-3-methylbenzalpyruvate	8.5	207.065	206.058	[M+H]+	C11H10O4	Spectral Library - Bruker MetaboBASE Personal Library 2.0_in-silico, Spectral Library - Bruker MetaboBASE Personal Library 2.0_in-silico	20110	46.9	-0.172	-0.83	552.2	0	1192
2-(Methylamino)benzoic acid	2.86	152.071	151.063	[M+H]+	C8H9NO2	Spectral Library - Bruker NIST 2020 MSMS Spectral Library_hr, Spectral Library - Bruker NIST 2020 MSMS Spectral Library_hr, Spectral Library - Bruker NIST 2020 MSMS Spectral Library_hr	20210	5.8	-0.048	-0.313	550.3	0	4041
[4-(Acetylamino)phenyl]acetic acid	10.27	194.081	193.074	[M+H]+	C10H11NO3	Spectral Library - Bruker NIST 2020 MSMS Spectral Library_hr, Spectral Library - Bruker NIST 2020 MSMS Spectral Library_hr	20210	11.5	-0.172	-0.886	546.2	112	13743
N,2-Dihydroxybenzenecarboximidic acid	6.74	152.035	153.042	[M-H]-, [M+H]+	C7H7NO3	Spectral Library - Bruker NIST 2020 MSMS Spectral Library_hr, Spectral Library - Bruker NIST 2020 MSMS Spectral Library_hr	20010	∞	-0.132	-0.87	543.8	0	2420
2-keto valeric acid	1.23	115.04	116.047	[M-H]-	C5H8O3	Spectral Library - Bruker MetaboBASE Personal Library 3.0, Spectral Library - Bruker MetaboBASE Personal Library 3.0	20010	∞	0.065	0.563	542.5	0	752
5-(6-Methyl-7-oxooctyl)furan-2(5H)-one	13.1	225.148	224.141	[M+H]+, [M-H]-, [M+Na]+	C13H20O3	Spectral Library - Bruker NIST 2020 MSMS Spectral Library_hr, Spectral Library - Bruker NIST 2020 MSMS Spectral Library_hr, Spectral Library - Bruker NIST 2020 MSMS Spectral Library_hr	10210	6.4	-0.675	-3	541.6	35895	24231
3-(3-Aminophenyl)-2H-1-benzopyran-2-one	11.83	238.086	237.079	[M+H]+	C15H11NO2	Spectral Library - Bruker NIST 2020 MSMS Spectral Library_hr, Spectral Library - Bruker NIST 2020 MSMS Spectral Library_hr, Spectral Library - Bruker NIST 2020 MSMS Spectral Library_hr	20110	38.5	-0.431	-1.81	535.5	0	7664
3,4-Ethylenedioxymethcathinone	11.61	222.112	221.105	[M+H]+, [M+Na]+	C12H15NO3	Spectral Library - Bruker NIST 2020 MSMS Spectral Library_hr, Spectral Library - Bruker NIST 2020 MSMS Spectral Library_hr	20210	12.2	-0.371	-1.671	535	900	32721
Trp derivative	9.97	224.091	223.084	[M+H]+	C11H13NO4	Spectral Library - Bruker MetaboBASE Personal Library 2.0_in-silico, Spectral Library - Bruker MetaboBASE Personal Library 2.0_in-silico	20210	15.2	-0.249	-1.109	526	0	5221
5-(2-Phenylethyl)-1H-pyrazole-3-carboxylic acid	5.42	215.082	216.089	[M-H]-	C12H12N2O2	Spectral Library - Bruker NIST 2020 MSMS Spectral Library_hr, Spectral Library - Bruker NIST 2020 MSMS Spectral Library_hr	10010	∞	-0.504	-2.343	524	0	3294
Thr Ser Ser Phe	6.24	441.197	440.19	[M+H]+	C19H28N4O8	Spectral Library - Bruker MetaboBASE Personal Library 2.0_in-silico, Spectral Library - Bruker MetaboBASE Personal Library 2.0_in-silico	20110	82.5	-0.627	-1.421	523.3	0	1184
4-Hydroxyquinoline	5.56	146.06	145.053	[M+H]+	C9H7NO	Spectral Library - Bruker NIST 2020 MSMS Spectral Library_hr, Spectral Library - Bruker NIST 2020 MSMS Spectral Library_hr	20010	∞	-0.236	-1.618	516.1	0	2136
methyl 6-[(3,4-dimethylphenyl)carbamoyl]pyridine-2-carboxylate	12.32	285.123	284.116	[M+H]+	C16H16N2O3	Spectral Library - Bruker MetaboBASE Personal Library 3.0, Spectral Library - Bruker MetaboBASE Personal Library 3.0, Spectral Library - Bruker MetaboBASE Personal Library 3.0	20210	14	-0.193	-0.678	509.5	0	2680
Ozagrel	7.55	229.097	228.09	[M+H]+	C13H12N2O2	Spectral Library - Bruker MetaboBASE Personal Library 2.0_in-silico, Spectral Library - Bruker MetaboBASE Personal Library 2.0_in-silico	20010	∞	0.077	0.335	501.9	0	2205

## Sheet: Longan
Name	RT [min]	m/z meas.	M meas.	Ions	Molecular Formula	Annotations	AQ	mSigma	Δm/z [mDa]	Δm/z [ppm]	MS/MS score	blank_1_1__[POS]778_[NEG]800	guiyuanrou_100mg_ml_10_1_7_[POS]87_[NEG]99
Malonic acid	0.81	103.004	104.011	[M-H]-	C3H4O4	Spectral Library - Bruker NIST 2020 MSMS Spectral Library_hr, Spectral Library - Bruker NIST 2020 MSMS Spectral Library_hr	20020	∞	0.042	0.405	1000	311	4234
3-Hydroxy-2-methylbutanoic acid	0.96	117.055	118.063	[M-H]-	C5H10O3	Spectral Library - Bruker NIST 2020 MSMS Spectral Library_hr, Spectral Library - Bruker NIST 2020 MSMS Spectral Library_hr	10020	∞	-0.302	-2.576	1000	153	885
Betaine	10.74	118.086	117.079	[M+H]+	C5H11NO2	Spectral Library - Bruker NIST 2020 MSMS Spectral Library_hr, Spectral Library - Bruker NIST 2020 MSMS Spectral Library_hr	20220	13.1	0.028	0.234	999.9	0	13736
Methylmalonic acid	0.91	117.02	118.027	[M-H]-	C4H6O4	Spectral Library - Bruker NIST 2020 MSMS Spectral Library_hr, Spectral Library - Bruker NIST 2020 MSMS Spectral Library_hr, Spectral Library - Bruker NIST 2020 MSMS Spectral Library_hr	10220	5.9	0.267	2.284	998.3	841	61701
Dibenzylamine	10.91	198.128	197.12	[M+H]+	C14H15N	Spectral Library - Bruker NIST 2020 MSMS Spectral Library_hr, Spectral Library - Bruker NIST 2020 MSMS Spectral Library_hr	20220	9.4	-0.028	-0.139	997.7	0	3896
5'-S-Methyl-5'-thioadenosine	7.57	298.097	297.09	[M+H]+	C11H15N5O3S	Spectral Library - Bruker NIST 2020 MSMS Spectral Library_hr, Spectral Library - Bruker NIST 2020 MSMS Spectral Library_hr	20120	35.5	0.045	0.151	993.3	497	1836
2-Amino-2-ethylbutanoic acid	1.01	132.102	131.095	[M+H]+	C6H13NO2	Spectral Library - Bruker NIST 2020 MSMS Spectral Library_hr, Spectral Library - Bruker NIST 2020 MSMS Spectral Library_hr, Spectral Library - Bruker NIST 2020 MSMS Spectral Library_hr, Spectral Library - Bruker NIST 2020 MSMS Spectral Library_hr, Spectral Library - Bruker NIST 2020 MSMS Spectral Library_hr, Spectral Library - Bruker NIST 2020 MSMS Spectral Library_hr, Spectral Library - Bruker N…	20220	8.9	-0.006	-0.049	993.2	93	13846
Adenosine	4.07	268.104	267.097	[M+H]+	C10H13N5O4	Spectral Library - Bruker NIST 2020 MSMS Spectral Library_hr, Spectral Library - Bruker NIST 2020 MSMS Spectral Library_hr	20020	∞	-0.066	-0.245	977.5	236	1500
1-Oleoyl-sn-glycero-3-phosphocholine	16.23	522.355	521.348	[M+H]+, [M+Na]+	C26H52NO7P	Spectral Library - Bruker NIST 2020 MSMS Spectral Library_hr, Spectral Library - Bruker NIST 2020 MSMS Spectral Library_hr	20120	36.8	-0.24	-0.46	977.2	0	5415
1-Palmitoyl-sn-glycero-3-phosphocholine	16.15	496.339	495.332	[M+H]+, [M+Na]+	C24H50NO7P	Spectral Library - Bruker NIST 2020 MSMS Spectral Library_hr, Spectral Library - Bruker NIST 2020 MSMS Spectral Library_hr	20120	56.1	-0.77	-1.552	973.7	0	5613
9-OAHSA	16.71	563.503	564.511	[M-H]-	C36H68O4	Spectral Library - Bruker MetaboBASE Personal Library 3.0, Spectral Library - Bruker MetaboBASE Personal Library 3.0	10120	57	-1.13	-2.005	971.7	309	12951
Adenine	1.88	136.062	135.054	[M+H]+	C5H5N5	Spectral Library - Bruker NIST 2020 MSMS Spectral Library_hr, Spectral Library - Bruker NIST 2020 MSMS Spectral Library_hr	20220	12.7	-0.013	-0.099	970.5	61	12792
DL-Phenylalanine	2.54	166.086	165.079	[M+H]+	C9H11NO2	Spectral Library - Bruker NIST 2020 MSMS Spectral Library_hr, Spectral Library - Bruker NIST 2020 MSMS Spectral Library_hr, Spectral Library - Bruker NIST 2020 MSMS Spectral Library_hr, Spectral Library - Bruker NIST 2020 MSMS Spectral Library_hr, Spectral Library - Bruker NIST 2020 MSMS Spectral Library_hr	20120	29.6	-0.023	-0.137	962	0	2658
4-Pyridinecarboxylic acid	1.07	124.039	123.032	[M+H]+	C6H5NO2	Spectral Library - Bruker NIST 2020 MSMS Spectral Library_hr, Spectral Library - Bruker NIST 2020 MSMS Spectral Library_hr, Spectral Library - Bruker NIST 2020 MSMS Spectral Library_hr	20220	5.2	-0.049	-0.395	954.5	117	8966
D-Fructose	0.8	179.056	180.063	[M-H]-, [M-H-H2O]-	C6H12O6	Spectral Library - Bruker NIST 2020 MSMS Spectral Library_hr, Spectral Library - Bruker NIST 2020 MSMS Spectral Library_hr	20220	9.2	0.095	0.529	953.9	5531	20785
(10E,15Z)-9,12,13-Trihydroxyoctadeca-10,15-dienoic acid	12.66	327.217	328.224	[M-H]-	C18H32O5	Spectral Library - Bruker NIST 2020 MSMS Spectral Library_hr, Spectral Library - Bruker NIST 2020 MSMS Spectral Library_hr	10220	12.4	-0.786	-2.401	948.6	50	4070
Choline	0.69	104.107	103.1	[M+H]+	C5H13NO	Spectral Library - Bruker MetaboBASE Personal Library 3.0, Spectral Library - Bruker MetaboBASE Personal Library 3.0	20220	2.1	-0.059	-0.568	946.4	0	49475
(-)-Quinic acid	0.6	191.056	192.063	[M-H]-, [M+HCOOH-H]-	C7H12O6	Spectral Library - Bruker NIST 2020 MSMS Spectral Library_hr, Spectral Library - Bruker NIST 2020 MSMS Spectral Library_hr	20220	2.2	-0.048	-0.251	922.7	0	34651
Threonic acid	0.61	135.03	136.037	[M-H]-, [M+CH3COOH-H]-	C4H8O5	Spectral Library - Bruker NIST 2020 MSMS Spectral Library_hr, Spectral Library - Bruker NIST 2020 MSMS Spectral Library_hr	20220	1.9	0.068	0.504	917.4	40	29017
(2E)-6-Hydroxy-2,6-dimethylocta-2,7-dien-1-yl 6-O-.alpha.-L-arabinopyranosyl-.beta.-D-glucopyranoside	11.76	463.217	464.224	[M-H]-	C21H36O11	Spectral Library - Bruker NIST 2020 MSMS Spectral Library_hr, Spectral Library - Bruker NIST 2020 MSMS Spectral Library_hr	10120	29.9	-1.564	-3.376	903.8	0	1727
9-PAHSA	16.69	537.487	538.494	[M-H]-	C34H66O4	Spectral Library - Bruker MetaboBASE Personal Library 3.0, Spectral Library - Bruker MetaboBASE Personal Library 3.0, Spectral Library - Bruker MetaboBASE Personal Library 3.0	10110	47.4	-1.788	-3.326	893.1	1955	14125
Fumaric acid	0.58	115.004	116.011	[M-H]-	C4H4O4	Spectral Library - Bruker NIST 2020 MSMS Spectral Library_hr, Spectral Library - Bruker NIST 2020 MSMS Spectral Library_hr, Spectral Library - Bruker NIST 2020 MSMS Spectral Library_hr	20210	6.8	0.009	0.083	877.3	0	9930
2-Cyclohexen-1-one, 4-[(1E)-3-(.beta.-D-glucopyranosyloxy)-1-buten-1-yl]-4-hydroxy-3,5,5-trimethyl-, (4S)-	8.09	385.187	386.195	[M-H]-	C19H30O8	Spectral Library - Bruker NIST 2020 MSMS Spectral Library_hr, Spectral Library - Bruker NIST 2020 MSMS Spectral Library_hr	20010	∞	0.498	1.293	868.1	0	567
DL-Malic acid	0.59	133.014	134.022	[M-H]-	C4H6O5	Spectral Library - Bruker NIST 2020 MSMS Spectral Library_hr, Spectral Library - Bruker NIST 2020 MSMS Spectral Library_hr	20210	11.7	0.103	0.773	866.8	0	15088
8,3'-Dihydroxy-5,7,4'-trimethoxyflavone	11.1	345.097	344.09	[M+H]+, [M+Na]+	C18H16O7	Spectral Library - Bruker MetaboBASE Personal Library 2.0_in-silico, Spectral Library - Bruker MetaboBASE Personal Library 2.0_in-silico, Spectral Library - Bruker MetaboBASE Personal Library 2.0_in-silico, Spectral Library - Bruker MetaboBASE Personal Library 2.0_in-silico, Spectral Library - Bruker MetaboBASE Personal Library 2.0_in-silico, Spectral Library - Bruker MetaboBASE Personal Library …	20010	∞	0.169	0.489	845.8	97	2515
Pinolenic Acid	15.98	277.217	278.224	[M-H]-	C18H30O2	Spectral Library - Bruker NIST 2020 MSMS Spectral Library_hr, Spectral Library - Bruker NIST 2020 MSMS Spectral Library_hr	20210	13.2	-0.53	-1.911	832.1	1845	176566
Sayaendoside	9.49	415.16	416.167	[M-H]-	C19H28O10	Spectral Library - Bruker NIST 2020 MSMS Spectral Library_hr, Spectral Library - Bruker NIST 2020 MSMS Spectral Library_hr, Spectral Library - Bruker NIST 2020 MSMS Spectral Library_hr, Spectral Library - Bruker NIST 2020 MSMS Spectral Library_hr, Spectral Library - Bruker NIST 2020 MSMS Spectral Library_hr	10110	39.7	-1.217	-2.931	775.4	0	746
3-Indoleacrylic acid	3.9	188.071	187.063	[M+H]+	C11H9NO2	Spectral Library - Bruker NIST 2020 MSMS Spectral Library_hr, Spectral Library - Bruker NIST 2020 MSMS Spectral Library_hr, Spectral Library - Bruker NIST 2020 MSMS Spectral Library_hr, Spectral Library - Bruker NIST 2020 MSMS Spectral Library_hr, Spectral Library - Bruker NIST 2020 MSMS Spectral Library_hr, Spectral Library - Bruker NIST 2020 MSMS Spectral Library_hr, Spectral Library - Bruker N…	20010	∞	-0.027	-0.146	756.2	0	1739
L-Tryptophan	3.91	205.097	204.089	[M+H]+	C11H12N2O2	Spectral Library - Bruker NIST 2020 MSMS Spectral Library_hr, Spectral Library - Bruker NIST 2020 MSMS Spectral Library_hr	10010	∞	-0.602	-2.935	751.4	0	1659
5-Nitro-2-(3-phenylpropylamino)benzoic acid	11.63	301.118	300.111	[M+H]+	C16H16N2O4	Spectral Library - Bruker NIST 2020 MSMS Spectral Library_hr, Spectral Library - Bruker NIST 2020 MSMS Spectral Library_hr	20210	5.6	-0.001	-0.005	746.6	0	2907
6-Biopterin	6.08	238.094	237.086	[M+H]+	C9H11N5O3	Spectral Library - Bruker NIST 2020 MSMS Spectral Library_hr, Spectral Library - Bruker NIST 2020 MSMS Spectral Library_hr	20010	∞	0.065	0.275	709.1	0	1490
11,14,17-Eicosatrienoic acid, (Z,Z,Z)-	16.88	307.262	306.255	[M+H]+	C20H34O2	Spectral Library - Bruker NIST 2020 MSMS Spectral Library_hr, Spectral Library - Bruker NIST 2020 MSMS Spectral Library_hr, Spectral Library - Bruker NIST 2020 MSMS Spectral Library_hr, Spectral Library - Bruker NIST 2020 MSMS Spectral Library_hr, Spectral Library - Bruker NIST 2020 MSMS Spectral Library_hr, Spectral Library - Bruker NIST 2020 MSMS Spectral Library_hr, Spectral Library - Bruker N…	10110	24.4	-0.949	-3.089	703.6	238	3772
9-SAHSA	16.74	565.518	566.526	[M-H]-	C36H70O4	Spectral Library - Bruker MetaboBASE Personal Library 3.0, Spectral Library - Bruker MetaboBASE Personal Library 3.0, Spectral Library - Bruker MetaboBASE Personal Library 3.0	10110	66.5	-1.894	-3.349	626.7	900	5600
Aflatoxin G2	11.11	331.081	330.074	[M+H]+, [M+Na]+	C17H14O7	Spectral Library - Bruker NIST 2020 MSMS Spectral Library_hr, Spectral Library - Bruker NIST 2020 MSMS Spectral Library_hr	20110	66.8	0.026	0.079	577	0	1549
Phenethyl rutinoside	9.92	429.177	430.184	[M-H]-	C20H30O10	Spectral Library - Bruker NIST 2020 MSMS Spectral Library_hr, Spectral Library - Bruker NIST 2020 MSMS Spectral Library_hr	20110	26.7	0.262	0.611	568.8	0	1248
C17-Sphinganine	15.95	288.29	287.283	[M+H]+	C17H37NO2	Spectral Library - MoNA-export-GNPS.msp, Spectral Library - MoNA-export-GNPS.msp	20210	12.1	0.131	0.455	568.1	283	6476
4-[(Isobutylamino)methyl]benzoic acid	3.65	208.133	207.126	[M+H]+	C12H17NO2	Spectral Library - Bruker NIST 2020 MSMS Spectral Library_hr, Spectral Library - Bruker NIST 2020 MSMS Spectral Library_hr	20210	8.6	0.007	0.035	554.2	0	3941

## Sheet: Misai Kucing
Name	RT [min]	m/z meas.	M meas.	Ions	Molecular Formula	Annotations	AQ	mSigma	Δm/z [mDa]	Δm/z [ppm]	MS/MS score	blank_1_1__[POS]778_[NEG]800	maoxucao_10mg_ml_9_1__[POS]781_[NEG]803
(2E)-2-(Propan-2-yl)but-2-enedioic acid	1.77	157.051	158.058	[M-H]-	C7H10O4	Spectral Library - Bruker NIST 2020 MSMS Spectral Library_hr, Spectral Library - Bruker NIST 2020 MSMS Spectral Library_hr	20020	∞	0.237	1.509	1000	0	595
Methylmalonic acid	0.94	117.019	118.026	[M-H]-	C4H6O4	Spectral Library - Bruker NIST 2020 MSMS Spectral Library_hr, Spectral Library - Bruker NIST 2020 MSMS Spectral Library_hr, Spectral Library - Bruker NIST 2020 MSMS Spectral Library_hr	20220	1.1	-0.114	-0.975	1000	841	21032
Benzoic acid	14.02	121.03	122.037	[M-H]-	C7H6O2	Spectral Library - Bruker NIST 2020 MSMS Spectral Library_hr, Spectral Library - Bruker NIST 2020 MSMS Spectral Library_hr	10220	15	0.353	2.914	1000	596	8492
Tuberonic acid	5.55	225.113	226.12	[M-H]-	C12H18O4	Spectral Library - Bruker NIST 2020 MSMS Spectral Library_hr, Spectral Library - Bruker NIST 2020 MSMS Spectral Library_hr	20220	17.3	-0.335	-1.487	999.6	0	14666
Adenosine	4.06	268.104	267.097	[M+H]+	C10H13N5O4	Spectral Library - Bruker NIST 2020 MSMS Spectral Library_hr, Spectral Library - Bruker NIST 2020 MSMS Spectral Library_hr	20220	12.2	-0.114	-0.425	997.9	236	37566
Indole-5-carboxylic acid	7.98	160.04	161.047	[M-H]-	C9H7NO2	Spectral Library - Bruker NIST 2020 MSMS Spectral Library_hr, Spectral Library - Bruker NIST 2020 MSMS Spectral Library_hr, Spectral Library - Bruker NIST 2020 MSMS Spectral Library_hr, Spectral Library - Bruker NIST 2020 MSMS Spectral Library_hr	10220	19.7	-0.345	-2.157	996.4	0	4156
Grevillic acid	2.64	179.035	180.042	[M-H]-	C9H8O4	Spectral Library - Bruker NIST 2020 MSMS Spectral Library_hr, Spectral Library - Bruker NIST 2020 MSMS Spectral Library_hr, Spectral Library - Bruker NIST 2020 MSMS Spectral Library_hr, Spectral Library - Bruker NIST 2020 MSMS Spectral Library_hr, Spectral Library - Bruker NIST 2020 MSMS Spectral Library_hr, Spectral Library - Bruker NIST 2020 MSMS Spectral Library_hr, Spectral Library - Bruker N…	20020	∞	-0.086	-0.483	995.1	0	31767
Salicylic acid	2.64	137.024	138.032	[M-H]-	C7H6O3	Spectral Library - Bruker NIST 2020 MSMS Spectral Library_hr, Spectral Library - Bruker NIST 2020 MSMS Spectral Library_hr, Spectral Library - Bruker NIST 2020 MSMS Spectral Library_hr, Spectral Library - Bruker NIST 2020 MSMS Spectral Library_hr	20220	8	-0.177	-1.289	993.4	77	30123
Gentisic acid	1.02	153.019	154.027	[M-H]-	C7H6O4	Spectral Library - Bruker NIST 2020 MSMS Spectral Library_hr, Spectral Library - Bruker NIST 2020 MSMS Spectral Library_hr, Spectral Library - Bruker NIST 2020 MSMS Spectral Library_hr, Spectral Library - Bruker NIST 2020 MSMS Spectral Library_hr, Spectral Library - Bruker NIST 2020 MSMS Spectral Library_hr, Spectral Library - Bruker NIST 2020 MSMS Spectral Library_hr, Spectral Library - Bruker N…	20220	7	-0.023	-0.153	992.8	48	10762
N-Acetyl-2,3-dihydro-1H-pyrrole	16.42	112.076	111.068	[M+H]+	C6H9NO	Spectral Library - Bruker MetaboBASE Personal Library 2.0_in-silico, Spectral Library - Bruker MetaboBASE Personal Library 2.0_in-silico	20220	2.6	-0.073	-0.653	992.2	179	48270
D-Fructose	0.75	179.056	180.063	[M-H]-, [M+HCOOH-H]-	C6H12O6	Spectral Library - Bruker NIST 2020 MSMS Spectral Library_hr, Spectral Library - Bruker NIST 2020 MSMS Spectral Library_hr	20220	9.4	0.029	0.163	985.8	5531	23974
N-.alpha.-Acetyl-L-ornithine	0.71	175.108	174.1	[M+H]+, [M+Na]+, [M+K]+	C7H14N2O3	Spectral Library - Bruker NIST 2020 MSMS Spectral Library_hr, Spectral Library - Bruker NIST 2020 MSMS Spectral Library_hr	20120	20.9	-0.01	-0.059	985.7	0	47905
(3,4-Dihydroxyphenyl)ethanol	3.98	153.055	154.063	[M-H]-	C8H10O3	Spectral Library - Bruker NIST 2020 MSMS Spectral Library_hr, Spectral Library - Bruker NIST 2020 MSMS Spectral Library_hr, Spectral Library - Bruker NIST 2020 MSMS Spectral Library_hr, Spectral Library - Bruker NIST 2020 MSMS Spectral Library_hr, Spectral Library - Bruker NIST 2020 MSMS Spectral Library_hr	20020	∞	-0.305	-1.993	985.4	0	3660
Niacinamide	2.16	123.055	122.048	[M+H]+	C6H6N2O	Spectral Library - Bruker NIST 2020 MSMS Spectral Library_hr, Spectral Library - Bruker NIST 2020 MSMS Spectral Library_hr, Spectral Library - Bruker NIST 2020 MSMS Spectral Library_hr	20220	18.3	-0.062	-0.502	984.9	68	9600
3,4-Dihydroxyacetophenone	6.21	151.04	152.047	[M-H]-	C8H8O3	Spectral Library - Bruker NIST 2020 MSMS Spectral Library_hr, Spectral Library - Bruker NIST 2020 MSMS Spectral Library_hr, Spectral Library - Bruker NIST 2020 MSMS Spectral Library_hr, Spectral Library - Bruker NIST 2020 MSMS Spectral Library_hr, Spectral Library - Bruker NIST 2020 MSMS Spectral Library_hr	10220	19.5	-0.55	-3.639	981.3	0	2779
Tuberonic acid glucoside	5.68	387.165	388.172	[M-H]-	C18H28O9	Spectral Library - Bruker NIST 2020 MSMS Spectral Library_hr, Spectral Library - Bruker NIST 2020 MSMS Spectral Library_hr	10220	10.8	-0.876	-2.262	980.8	0	4231
Trans-Ferulic acid	5.62	193.05	194.057	[M-H]-	C10H10O4	Spectral Library - Bruker NIST 2020 MSMS Spectral Library_hr, Spectral Library - Bruker NIST 2020 MSMS Spectral Library_hr, Spectral Library - Bruker NIST 2020 MSMS Spectral Library_hr	10220	17.5	-0.516	-2.674	980.5	0	5622
4-Amino-1-butanol	1.64	90.0914	89.0841	[M+H]+	C4H11NO	Spectral Library - Bruker NIST 2020 MSMS Spectral Library_hr, Spectral Library - Bruker NIST 2020 MSMS Spectral Library_hr, Spectral Library - Bruker NIST 2020 MSMS Spectral Library_hr	20220	19.2	0.034	0.375	980.5	153	5929
Methyl DL-pyroglutamate	2.93	144.065	143.058	[M+H]+	C6H9NO3	Spectral Library - Bruker NIST 2020 MSMS Spectral Library_hr, Spectral Library - Bruker NIST 2020 MSMS Spectral Library_hr, Spectral Library - Bruker NIST 2020 MSMS Spectral Library_hr, Spectral Library - Bruker NIST 2020 MSMS Spectral Library_hr	20220	10.6	-0.03	-0.207	980.2	62	9852
L-Phenylalanine	2.51	166.086	165.079	[M+H]+	C9H11NO2	Spectral Library - Bruker NIST 2020 MSMS Spectral Library_hr, Spectral Library - Bruker NIST 2020 MSMS Spectral Library_hr, Spectral Library - Bruker NIST 2020 MSMS Spectral Library_hr, Spectral Library - Bruker NIST 2020 MSMS Spectral Library_hr, Spectral Library - Bruker NIST 2020 MSMS Spectral Library_hr	20220	11	0.063	0.377	977.7	0	2439
N-propan-2-yl-4,5,6,7-tetrahydro-1H-indazole-3-carboxamide	8.16	208.144	207.136	[M+H]+	C11H17N3O	Spectral Library - Bruker MetaboBASE Personal Library 3.0, Spectral Library - Bruker MetaboBASE Personal Library 3.0, Spectral Library - Bruker MetaboBASE Personal Library 3.0	10120	27.9	-0.747	-3.588	976.1	0	7167
Luteolin	11.92	285.041	286.048	[M-H]-	C15H10O6	Spectral Library - Bruker NIST 2020 MSMS Spectral Library_hr, Spectral Library - Bruker NIST 2020 MSMS Spectral Library_hr, Spectral Library - Bruker NIST 2020 MSMS Spectral Library_hr	20220	9.1	0.268	0.94	972.9	25	25825
Methyl linolenate	16.56	293.247	292.24	[M+H]+	C19H32O2	Spectral Library - Bruker NIST 2020 MSMS Spectral Library_hr, Spectral Library - Bruker NIST 2020 MSMS Spectral Library_hr, Spectral Library - Bruker NIST 2020 MSMS Spectral Library_hr	20220	5.6	-0.162	-0.554	971	426	22139
Ethyl 3,5-dihydroxybenzoate	10.34	181.05	182.058	[M-H]-	C9H10O4	Spectral Library - Bruker NIST 2020 MSMS Spectral Library_hr, Spectral Library - Bruker NIST 2020 MSMS Spectral Library_hr	20220	4.1	-0.322	-1.779	970.4	0	7036
Indole-7-carboxaldehyde	9.07	146.06	145.053	[M+H]+	C9H7NO	Spectral Library - Bruker NIST 2020 MSMS Spectral Library_hr, Spectral Library - Bruker NIST 2020 MSMS Spectral Library_hr, Spectral Library - Bruker NIST 2020 MSMS Spectral Library_hr, Spectral Library - Bruker NIST 2020 MSMS Spectral Library_hr, Spectral Library - Bruker NIST 2020 MSMS Spectral Library_hr, Spectral Library - Bruker NIST 2020 MSMS Spectral Library_hr, Spectral Library - Bruker N…	20220	2.9	-0.019	-0.132	969.9	47	31481
NCGC00180593-02!2-[2-[1-carboxy-2-(3,4-dihydroxyphenyl)ethoxy]carbonyl-3,4-bis(3,4-dihydroxyphenyl)cyclobutanecarbonyl]oxy-3-(3,4-dihydroxyphenyl)propanoic acid	7.64	719.16	720.168	[M-H]-, [M+H]+	C36H32O16	Spectral Library - MoNA-export-GNPS.msp, Spectral Library - MoNA-export-GNPS.msp	20220	3.8	-1.379	-1.918	969.8	0	150171
13S-Hydroxy-9Z,11E-octadecadienoic acid, methyl ester	15.6	293.247	310.25	[M+H-H2O]+, [M+Na]+	C19H34O3	Spectral Library - Bruker NIST 2020 MSMS Spectral Library_hr, Spectral Library - Bruker NIST 2020 MSMS Spectral Library_hr	10220	17.3	-0.904	-3.083	969.8	2065	32063
5-Hydroxy-2-(hydroxymethyl)pyridine	1.81	126.055	125.048	[M+H]+	C6H7NO2	Spectral Library - Bruker NIST 2020 MSMS Spectral Library_hr, Spectral Library - Bruker NIST 2020 MSMS Spectral Library_hr, Spectral Library - Bruker NIST 2020 MSMS Spectral Library_hr	20220	3.2	-0.062	-0.493	969.4	52	7370
N-Acetyl-DL-leucine	6.85	174.113	173.105	[M+H]+, [M+Na]+	C8H15NO3	Spectral Library - Bruker NIST 2020 MSMS Spectral Library_hr, Spectral Library - Bruker NIST 2020 MSMS Spectral Library_hr, Spectral Library - Bruker NIST 2020 MSMS Spectral Library_hr	20220	10.8	0.072	0.414	969.1	113	67469
Methyl .gamma.-linolenate	16.29	293.247	292.24	[M+H]+	C19H32O2	Spectral Library - Bruker NIST 2020 MSMS Spectral Library_hr, Spectral Library - Bruker NIST 2020 MSMS Spectral Library_hr, Spectral Library - Bruker NIST 2020 MSMS Spectral Library_hr, Spectral Library - Bruker NIST 2020 MSMS Spectral Library_hr	20220	14.5	-0.467	-1.591	967.8	0	96718
3-Hydroxyoctanoic acid	9.69	159.103	160.11	[M-H]-	C8H16O3	Spectral Library - Bruker NIST 2020 MSMS Spectral Library_hr, Spectral Library - Bruker NIST 2020 MSMS Spectral Library_hr	20020	∞	0.011	0.067	966.2	121	1936
3-(Carboxymethyl)benzoic acid	10.79	179.035	180.042	[M-H]-	C9H8O4	Spectral Library - Bruker NIST 2020 MSMS Spectral Library_hr, Spectral Library - Bruker NIST 2020 MSMS Spectral Library_hr, Spectral Library - Bruker NIST 2020 MSMS Spectral Library_hr, Spectral Library - Bruker NIST 2020 MSMS Spectral Library_hr, Spectral Library - Bruker NIST 2020 MSMS Spectral Library_hr, Spectral Library - Bruker NIST 2020 MSMS Spectral Library_hr, Spectral Library - Bruker N…	20220	16.2	0.218	1.219	966	70	14379
9-OAHSA	16.72	563.505	564.513	[M-H]-	C36H68O4	Spectral Library - Bruker MetaboBASE Personal Library 3.0, Spectral Library - Bruker MetaboBASE Personal Library 3.0	20120	50.6	1.016	1.802	965.8	309	10521
Azelaic acid	8.19	187.097	188.105	[M-H]-	C9H16O4	Spectral Library - Bruker NIST 2020 MSMS Spectral Library_hr, Spectral Library - Bruker NIST 2020 MSMS Spectral Library_hr	20220	14.7	-0.113	-0.605	965.6	1195	14688
Coumarin	9.62	147.044	146.037	[M+H]+	C9H6O2	Spectral Library - Bruker NIST 2020 MSMS Spectral Library_hr, Spectral Library - Bruker NIST 2020 MSMS Spectral Library_hr	20220	8.9	0.05	0.342	965.3	339	13444
Kaempferol 3-ss-D-galactoside	10.97	447.093	448.101	[M-H]-	C21H20O11	Spectral Library - Bruker NIST 2020 MSMS Spectral Library_hr, Spectral Library - Bruker NIST 2020 MSMS Spectral Library_hr, Spectral Library - Bruker NIST 2020 MSMS Spectral Library_hr	20120	27.2	0.023	0.051	962.2	0	14979
Dimethyl succinate	6.36	147.065	146.058	[M+H]+, [M+Na]+	C6H10O4	Spectral Library - Bruker NIST 2020 MSMS Spectral Library_hr, Spectral Library - Bruker NIST 2020 MSMS Spectral Library_hr	20220	12.2	-0.042	-0.285	959.3	182	2908
1-Palmitoyl-2-hydroxy-sn-glycero-3-phospho-(1'-rac-glycerol)	15.45	483.273	484.281	[M-H]-	C22H45O9P	Spectral Library - Bruker NIST 2020 MSMS Spectral Library_hr, Spectral Library - Bruker NIST 2020 MSMS Spectral Library_hr	20120	27.2	0.644	1.333	958.2	39	7572
Methyl 4-hydroxycinnamate	11.4	177.056	178.063	[M-H]-	C10H10O3	Spectral Library - Bruker NIST 2020 MSMS Spectral Library_hr, Spectral Library - Bruker NIST 2020 MSMS Spectral Library_hr	20220	17	0.102	0.578	957	0	4396
Ethyl p-coumarate	12.32	191.072	192.079	[M-H]-	C11H12O3	Spectral Library - Bruker NIST 2020 MSMS Spectral Library_hr, Spectral Library - Bruker NIST 2020 MSMS Spectral Library_hr	20220	15.9	0.182	0.95	957	0	5598
3'-Hydroxy-5,6,7,4'-tetramethoxyflavone	12.53	359.112	358.105	[M+H]+, [M+K]+, [M+Na]+, [M-H]-	C19H18O7	Spectral Library - Bruker NIST 2020 MSMS Spectral Library_hr, Spectral Library - Bruker NIST 2020 MSMS Spectral Library_hr	20220	1.7	-0.105	-0.292	951.6	0	395289
9-(2,3-Dihydroxypropoxy)-9-oxononanoic acid	9.56	261.135	262.142	[M-H]-	C12H22O6	Spectral Library - Bruker NIST 2020 MSMS Spectral Library_hr, Spectral Library - Bruker NIST 2020 MSMS Spectral Library_hr	20220	17.2	0.318	1.218	948.5	732	3040
Hyperin	10.44	463.088	464.096	[M-H]-, [M+H]+, [M+Na]+	C21H20O12	Spectral Library - Bruker NIST 2020 MSMS Spectral Library_hr, Spectral Library - Bruker NIST 2020 MSMS Spectral Library_hr, Spectral Library - Bruker NIST 2020 MSMS Spectral Library_hr, Spectral Library - Bruker NIST 2020 MSMS Spectral Library_hr	20120	28.5	0.251	0.542	947.2	0	8745
3-O-Feruloylquinic acid	4.89	367.102	368.109	[M-H]-	C17H20O9	Spectral Library - Bruker NIST 2020 MSMS Spectral Library_hr, Spectral Library - Bruker NIST 2020 MSMS Spectral Library_hr	10120	33.2	-1.711	-4.66	946.3	0	818
Methyl hydrogen azelate	11.6	201.113	202.12	[M-H]-	C10H18O4	Spectral Library - Bruker NIST 2020 MSMS Spectral Library_hr, Spectral Library - Bruker NIST 2020 MSMS Spectral Library_hr	20120	20.1	-0.078	-0.388	944.9	606	11719
Choline	0.66	104.107	103.1	[M+H]+	C5H13NO	Spectral Library - Bruker MetaboBASE Personal Library 3.0, Spectral Library - Bruker MetaboBASE Personal Library 3.0	20220	2.3	-0.167	-1.602	944.4	0	269968
Moupinamide	11.02	314.139	313.131	[M+H]+, [M+Na]+, [M-H]-	C18H19NO4	Spectral Library - Bruker NIST 2020 MSMS Spectral Library_hr, Spectral Library - Bruker NIST 2020 MSMS Spectral Library_hr	20220	7.4	-0.189	-0.601	944.2	0	46285
5Z,11Z,14Z-Eicosatrienoic acid	16.51	307.263	306.256	[M+H]+	C20H34O2	Spectral Library - Bruker NIST 2020 MSMS Spectral Library_hr, Spectral Library - Bruker NIST 2020 MSMS Spectral Library_hr, Spectral Library - Bruker NIST 2020 MSMS Spectral Library_hr, Spectral Library - Bruker NIST 2020 MSMS Spectral Library_hr, Spectral Library - Bruker NIST 2020 MSMS Spectral Library_hr	20220	15.9	-0.202	-0.657	944	451	20113
Ethyl trans-caffeate	11.57	207.066	208.073	[M-H]-	C11H12O4	Spectral Library - Bruker NIST 2020 MSMS Spectral Library_hr, Spectral Library - Bruker NIST 2020 MSMS Spectral Library_hr	20220	7.2	-0.149	-0.718	940.6	0	20958
Esculin	5.57	339.071	340.078	[M-H]-	C15H16O9	Spectral Library - Bruker NIST 2020 MSMS Spectral Library_hr, Spectral Library - Bruker NIST 2020 MSMS Spectral Library_hr	10120	28.9	-1.113	-3.281	940	0	1334
3-Hydroxymandelic acid	3.28	167.035	168.042	[M-H]-	C8H8O4	Spectral Library - Bruker NIST 2020 MSMS Spectral Library_hr, Spectral Library - Bruker NIST 2020 MSMS Spectral Library_hr	20220	13.7	-0.248	-1.483	936.7	0	4803
Apigenin	12.42	269.046	270.053	[M-H]-	C15H10O5	Spectral Library - Bruker NIST 2020 MSMS Spectral Library_hr, Spectral Library - Bruker NIST 2020 MSMS Spectral Library_hr	20220	18.8	0.355	1.321	936.6	0	6341
Nevadensin	12.98	343.083	344.09	[M-H]-, [M+Cl]-	C18H16O7	Spectral Library - Bruker Sumner MetaboBASE Plant Library - confirmed standards, Spectral Library - Bruker Sumner MetaboBASE Plant Library - confirmed standards, Spectral Library - Bruker Sumner MetaboBASE Plant Library - confirmed standards	20220	3.6	0.479	1.396	936.1	0	125680
Isoliquiritigenin	12.47	255.066	256.073	[M-H]-	C15H12O4	Spectral Library - Bruker Sumner MetaboBASE Plant Library - confirmed standards, Spectral Library - Bruker Sumner MetaboBASE Plant Library - confirmed standards	20120	78.1	-0.206	-0.81	935.4	0	4121
NCGC00380867-01_C27H46O9_9,12,15-Octadecatrienoic acid, 3-(hexopyranosyloxy)-2-hydroxypropyl ester, (9Z,12Z,15Z)-	15.58	513.308	514.315	[M-H]-, [M+Cl]-, [M+HCOOH-H]-	C27H46O9	Spectral Library - MoNA-export-GNPS.msp, Spectral Library - MoNA-export-GNPS.msp	10120	39.2	1.471	2.866	934.5	0	5154
Rosmarinic acid	7.63	359.077	360.084	[M-H]-	C18H16O8	Spectral Library - Bruker NIST 2020 MSMS Spectral Library_hr, Spectral Library - Bruker NIST 2020 MSMS Spectral Library_hr	20220	9.2	-0.451	-1.256	932.4	0	251728
Kynurenic acid	3.85	190.05	189.043	[M+H]+	C10H7NO3	Spectral Library - Bruker NIST 2020 MSMS Spectral Library_hr, Spectral Library - Bruker NIST 2020 MSMS Spectral Library_hr	20020	∞	0.023	0.121	931.5	0	5869
Ethyl morpholine-2-carboxylate	4.53	160.097	159.09	[M+H]+, [M+Na]+	C7H13NO3	Spectral Library - Bruker NIST 2020 MSMS Spectral Library_hr, Spectral Library - Bruker NIST 2020 MSMS Spectral Library_hr	20220	16.6	-0.042	-0.265	929.1	0	150894
cis-Parinaric Acid methyl ester	16.07	291.232	290.224	[M+H]+	C19H30O2	Spectral Library - Bruker NIST 2020 MSMS Spectral Library_hr, Spectral Library - Bruker NIST 2020 MSMS Spectral Library_hr, Spectral Library - Bruker NIST 2020 MSMS Spectral Library_hr	20220	14.8	-0.124	-0.426	927.9	634	192900
3',4'-Methylenedioxyorobol	11.11	297.04	298.047	[M-H]-	C16H10O6	Spectral Library - Bruker NIST 2020 MSMS Spectral Library_hr, Spectral Library - Bruker NIST 2020 MSMS Spectral Library_hr	20220	17.6	-0.3	-1.01	927.7	0	3245
Scutellarein tetramethyl ether	13.46	343.118	342.11	[M+H]+, [M+Na]+	C19H18O6	Spectral Library - Bruker NIST 2020 MSMS Spectral Library_hr, Spectral Library - Bruker NIST 2020 MSMS Spectral Library_hr	20120	103.4	0.088	0.255	927.6	327	481262
Astragalin	10.96	471.09	448.1	[M+Na]+, [M+H]+	C21H20O11	Spectral Library - Bruker NIST 2020 MSMS Spectral Library_hr, Spectral Library - Bruker NIST 2020 MSMS Spectral Library_hr	20220	9.8	-0.232	-0.492	921.7	0	16553
(9Z)-5,8,11-Trihydroxyoctadec-9-enoic acid	13.05	329.234	330.241	[M-H]-	C18H34O5	Spectral Library - Bruker NIST 2020 MSMS Spectral Library_hr, Spectral Library - Bruker NIST 2020 MSMS Spectral Library_hr	20220	18.3	0.206	0.625	917	142	25552
Protocatechuic aldehyde	4.83	137.024	138.032	[M-H]-	C7H6O3	Spectral Library - Bruker Sumner MetaboBASE Plant Library - confirmed standards, Spectral Library - Bruker Sumner MetaboBASE Plant Library - confirmed standards	20220	2.9	-0.13	-0.945	916.4	0	56377
p-Hydroxyphenyllactic acid	1.06	181.05	182.058	[M-H]-	C9H10O4	Spectral Library - Bruker NIST 2020 MSMS Spectral Library_hr, Spectral Library - Bruker NIST 2020 MSMS Spectral Library_hr	20220	9.2	-0.129	-0.714	913.6	52	3828
(3E)-4-(3,4-Dihydroxyphenyl)-3-buten-2-one	8.74	177.056	178.063	[M-H]-	C10H10O3	Spectral Library - Bruker NIST 2020 MSMS Spectral Library_hr, Spectral Library - Bruker NIST 2020 MSMS Spectral Library_hr	20020	∞	-0.134	-0.759	911.6	0	1828
Gnaphaliin	13.15	313.073	314.08	[M-H]-	C17H14O6	Spectral Library - Bruker NIST 2020 MSMS Spectral Library_hr, Spectral Library - Bruker NIST 2020 MSMS Spectral Library_hr, Spectral Library - Bruker NIST 2020 MSMS Spectral Library_hr	10220	18.1	0.876	2.798	911.4	39	4322
Loliolide	9.45	197.117	196.11	[M+H]+, [M+H-H2O]+, [M+Na]+	C11H16O3	Spectral Library - Bruker NIST 2020 MSMS Spectral Library_hr, Spectral Library - Bruker NIST 2020 MSMS Spectral Library_hr, Spectral Library - Bruker NIST 2020 MSMS Spectral Library_hr	20120	22.1	-0.016	-0.079	910	315	163379
(5AR,10aR)-Octahydrodipyrrolo[1,2-a:1',2'-D]pyrazine-5,10-dione	6.59	195.114	194.106	[M+H]+, [M+Na]+	C10H14N2O2	Spectral Library - Bruker NIST 2020 MSMS Spectral Library_hr, Spectral Library - Bruker NIST 2020 MSMS Spectral Library_hr	10220	9.1	0.736	3.772	906.1	0	14057
Dimethyl azelate	13.25	217.144	216.136	[M+H]+, [M+Na]+	C11H20O4	Spectral Library - Bruker NIST 2020 MSMS Spectral Library_hr, Spectral Library - Bruker NIST 2020 MSMS Spectral Library_hr	20220	9.6	0.094	0.435	902.3	1389	39804
1-Acetamidocyclopentane-1-carboxylic acid	1.4	170.082	171.089	[M-H]-	C8H13NO3	Spectral Library - Bruker NIST 2020 MSMS Spectral Library_hr, Spectral Library - Bruker NIST 2020 MSMS Spectral Library_hr	20220	14.8	-0.095	-0.557	901.7	0	2432
D-Valine, methyl ester	1.63	132.102	131.095	[M+H]+, [M+H-H2O]+, [M+Na]+	C6H13NO2	Spectral Library - Bruker NIST 2020 MSMS Spectral Library_hr, Spectral Library - Bruker NIST 2020 MSMS Spectral Library_hr	20220	8.4	-0.032	-0.246	901.3	51	80421
Hispidulin	13.26	299.057	300.064	[M-H]-	C16H12O6	Spectral Library - Bruker Sumner MetaboBASE Plant Library - confirmed standards, Spectral Library - Bruker Sumner MetaboBASE Plant Library - confirmed standards	20120	36.6	0.463	1.549	901	0	7512
4-Methoxy-2(5H)-furanone	8.92	115.039	114.032	[M+H]+	C5H6O3	Spectral Library - Bruker NIST 2020 MSMS Spectral Library_hr, Spectral Library - Bruker NIST 2020 MSMS Spectral Library_hr	20210	7.7	-0.106	-0.92	899.5	749	21729
2-(2,4-Dihydroxyphenyl)-5-hydroxy-8,8-dimethyl-3-(3-methylbut-2-enyl)pyrano[2,3-H]chromen-4-one	15.15	419.151	420.158	[M-H]-	C25H24O6	Spectral Library - Bruker NIST 2020 MSMS Spectral Library_hr, Spectral Library - Bruker NIST 2020 MSMS Spectral Library_hr	20110	58.6	0.76	1.812	898.7	0	11629
5,7-Dihydroxy-3,6-dimethoxy-2-phenyl-4H-chromen-4-one	13.72	313.072	314.08	[M-H]-	C17H14O6	Spectral Library - Bruker NIST 2020 MSMS Spectral Library_hr, Spectral Library - Bruker NIST 2020 MSMS Spectral Library_hr, Spectral Library - Bruker NIST 2020 MSMS Spectral Library_hr, Spectral Library - Bruker NIST 2020 MSMS Spectral Library_hr, Spectral Library - Bruker NIST 2020 MSMS Spectral Library_hr, Spectral Library - Bruker NIST 2020 MSMS Spectral Library_hr, Spectral Library - Bruker N…	20110	22.5	0.59	1.885	891.1	0	23200
9-PAHSA	16.68	537.49	538.497	[M-H]-	C34H66O4	Spectral Library - Bruker MetaboBASE Personal Library 3.0, Spectral Library - Bruker MetaboBASE Personal Library 3.0, Spectral Library - Bruker MetaboBASE Personal Library 3.0	10210	10.8	1.206	2.243	890	1955	13226
Pinolenic Acid	15.97	277.218	278.225	[M-H]-, [M+HCOOH-H]-	C18H30O2	Spectral Library - Bruker NIST 2020 MSMS Spectral Library_hr, Spectral Library - Bruker NIST 2020 MSMS Spectral Library_hr	10210	14.1	0.807	2.91	882.3	1845	366546
8,11-Tridecadienoic acid, 13-(3-pentyl-2-oxiranyl)-, (8Z,11Z)-	15.56	305.247	322.25	[M+H-H2O]+, [M+Na]+	C20H34O3	Spectral Library - Bruker NIST 2020 MSMS Spectral Library_hr, Spectral Library - Bruker NIST 2020 MSMS Spectral Library_hr, Spectral Library - Bruker NIST 2020 MSMS Spectral Library_hr, Spectral Library - Bruker NIST 2020 MSMS Spectral Library_hr, Spectral Library - Bruker NIST 2020 MSMS Spectral Library_hr, Spectral Library - Bruker NIST 2020 MSMS Spectral Library_hr, Spectral Library - Bruker N…	20210	15.9	-0.37	-1.213	881.9	983	23986
4',5-Dihydroxy-3',6,7-trimethoxyflavone	12.95	345.097	344.09	[M+H]+, [M+Na]+, [M+K]+	C18H16O7	Spectral Library - Bruker NIST 2020 MSMS Spectral Library_hr, Spectral Library - Bruker NIST 2020 MSMS Spectral Library_hr, Spectral Library - Bruker NIST 2020 MSMS Spectral Library_hr	20210	4.1	0.036	0.105	881.6	0	365530
(12Z)-9,10,11-Trihydroxyoctadec-12-enoic acid	13.45	329.233	330.241	[M-H]-	C18H34O5	Spectral Library - Bruker NIST 2020 MSMS Spectral Library_hr, Spectral Library - Bruker NIST 2020 MSMS Spectral Library_hr, Spectral Library - Bruker NIST 2020 MSMS Spectral Library_hr, Spectral Library - Bruker NIST 2020 MSMS Spectral Library_hr, Spectral Library - Bruker NIST 2020 MSMS Spectral Library_hr	20110	21.1	0.077	0.233	878.7	189	5233
NCGC00384529-01!5,7-dihydroxy-2-methyl-8-[(2S,3R,4R,5S,6R)-3,4,5-trihydroxy-6-(hydroxymethyl)oxan-2-yl]chromen-4-one	6.42	355.102	354.095	[M+H]+	C16H18O9	Spectral Library - MoNA-export-GNPS.msp, Spectral Library - MoNA-export-GNPS.msp, Spectral Library - MoNA-export-GNPS.msp	20010	∞	0.037	0.103	876.7	0	3087
4-(Hexopyranosyloxy)-3-methoxybenzoic acid	1.02	329.087	330.095	[M-H]-	C14H18O9	Spectral Library - Bruker NIST 2020 MSMS Spectral Library_hr, Spectral Library - Bruker NIST 2020 MSMS Spectral Library_hr	20110	27	-0.313	-0.95	876	0	1821
Dihydroactinidiolide	11.89	181.122	180.115	[M+H]+, [M+Na]+, [M+H-H2O]+	C11H16O2	Spectral Library - Bruker MetaboBASE Personal Library 3.0, Spectral Library - Bruker MetaboBASE Personal Library 3.0	20110	20.6	0.038	0.209	874.3	853	132548
2-Cyclohexen-1-one, 4-[(1E)-3-(.beta.-D-glucopyranosyloxy)-1-buten-1-yl]-4-hydroxy-3,5,5-trimethyl-, (4S)-	8.14	385.186	386.193	[M-H]-, [M+HCOOH-H]-, [M+Cl]-	C19H30O8	Spectral Library - Bruker NIST 2020 MSMS Spectral Library_hr, Spectral Library - Bruker NIST 2020 MSMS Spectral Library_hr	20210	7.2	-0.408	-1.06	873.7	0	11192
5,6,7,3',4'-Pentamethoxyflavone	12.97	373.128	372.121	[M+H]+	C20H20O7	Spectral Library - Bruker NIST 2020 MSMS Spectral Library_hr, Spectral Library - Bruker NIST 2020 MSMS Spectral Library_hr, Spectral Library - Bruker NIST 2020 MSMS Spectral Library_hr	20110	61.2	0.1	0.267	872.4	0	477337
2-Nitrophenol	8.43	138.019	139.027	[M-H]-	C6H5NO3	Spectral Library - Bruker NIST 2020 MSMS Spectral Library_hr, Spectral Library - Bruker NIST 2020 MSMS Spectral Library_hr, Spectral Library - Bruker NIST 2020 MSMS Spectral Library_hr, Spectral Library - Bruker NIST 2020 MSMS Spectral Library_hr	20010	∞	-0.193	-1.399	865.3	0	5327
16,16-Dimethylprostaglandin A1	15.86	345.244	364.262	[M-H-H2O]-, [M-H]-	C22H36O4	Spectral Library - Bruker NIST 2020 MSMS Spectral Library_hr, Spectral Library - Bruker NIST 2020 MSMS Spectral Library_hr, Spectral Library - Bruker NIST 2020 MSMS Spectral Library_hr	10210	19.1	0.9	2.607	863.3	42	15455
ZM 447439	10.37	514.243	513.236	[M+H]+	C29H31N5O4	Spectral Library - Bruker MetaboBASE Personal Library 2.0_in-silico, Spectral Library - Bruker MetaboBASE Personal Library 2.0_in-silico	10110	23.9	-1.655	-3.218	860.5	0	10396
Suberic acid	7.69	173.082	174.089	[M-H]-	C8H14O4	Spectral Library - Bruker NIST 2020 MSMS Spectral Library_hr, Spectral Library - Bruker NIST 2020 MSMS Spectral Library_hr	10110	39	-0.421	-2.434	855.7	0	1697
1H-2-Benzopyran-1-one, 6-hydroxy-8-methoxy-3-methyl-	11.93	205.051	206.058	[M-H]-	C11H10O4	Spectral Library - Bruker NIST 2020 MSMS Spectral Library_hr, Spectral Library - Bruker NIST 2020 MSMS Spectral Library_hr	20210	11.2	0.257	1.256	848.3	0	53731
5-(Hydroxymethyl)-2-furaldehyde	2.95	127.039	126.032	[M+H]+	C6H6O3	Spectral Library - Bruker NIST 2020 MSMS Spectral Library_hr, Spectral Library - Bruker NIST 2020 MSMS Spectral Library_hr, Spectral Library - Bruker NIST 2020 MSMS Spectral Library_hr, Spectral Library - Bruker NIST 2020 MSMS Spectral Library_hr, Spectral Library - Bruker NIST 2020 MSMS Spectral Library_hr, Spectral Library - Bruker NIST 2020 MSMS Spectral Library_hr	20210	14.7	-0.025	-0.193	846	45	3864
1-Naphthalenepentanoic acid, 3,4,4a,5,6,7,8,8a-octahydro-.beta.,2,5,5,8a-pentamethyl-3-oxo-, (8aS)-	15.79	319.229	320.236	[M-H]-	C20H32O3	Spectral Library - Bruker NIST 2020 MSMS Spectral Library_hr, Spectral Library - Bruker NIST 2020 MSMS Spectral Library_hr, Spectral Library - Bruker NIST 2020 MSMS Spectral Library_hr, Spectral Library - Bruker NIST 2020 MSMS Spectral Library_hr, Spectral Library - Bruker NIST 2020 MSMS Spectral Library_hr, Spectral Library - Bruker NIST 2020 MSMS Spectral Library_hr, Spectral Library - Bruker N…	10210	17.4	0.942	2.952	843.4	0	6260
3-Benzofurancarboxylic acid, 4-[3-[1-carboxy-2-(3,4-dihydroxyphenyl)ethoxy]-3-oxo-1-propen-1-yl]-2-(3,4-dihydroxyphenyl)-2,3-dihydro-7-hydroxy-, 3-methyl ester	9.36	551.118	552.126	[M-H]-	C28H24O12	Spectral Library - Bruker NIST 2020 MSMS Spectral Library_hr, Spectral Library - Bruker NIST 2020 MSMS Spectral Library_hr	10110	24.2	-1.174	-2.13	835.9	0	3286
(10E,15Z)-9,12,13-Trihydroxyoctadeca-10,15-dienoic acid	12.68	327.218	328.225	[M-H]-	C18H32O5	Spectral Library - Bruker NIST 2020 MSMS Spectral Library_hr, Spectral Library - Bruker NIST 2020 MSMS Spectral Library_hr	20210	4.9	0.302	0.923	835.3	50	20513
Ketologanic acid	6.39	373.113	374.12	[M-H]-	C16H22O10	Spectral Library - Bruker NIST 2020 MSMS Spectral Library_hr, Spectral Library - Bruker NIST 2020 MSMS Spectral Library_hr, Spectral Library - Bruker NIST 2020 MSMS Spectral Library_hr	10110	53.8	-1.114	-2.986	827.3	0	826
Stearidonic Acid ethyl ester	16.19	305.247	304.24	[M+H]+	C20H32O2	Spectral Library - Bruker NIST 2020 MSMS Spectral Library_hr, Spectral Library - Bruker NIST 2020 MSMS Spectral Library_hr, Spectral Library - Bruker NIST 2020 MSMS Spectral Library_hr, Spectral Library - Bruker NIST 2020 MSMS Spectral Library_hr, Spectral Library - Bruker NIST 2020 MSMS Spectral Library_hr, Spectral Library - Bruker NIST 2020 MSMS Spectral Library_hr, Spectral Library - Bruker N…	20210	17.3	-0.406	-1.329	826.2	0	28506
Isobutyrylphloroglucinol	9.77	197.08	196.073	[M+H]+, [M+Na]+	C10H12O4	Spectral Library - Bruker NIST 2020 MSMS Spectral Library_hr, Spectral Library - Bruker NIST 2020 MSMS Spectral Library_hr, Spectral Library - Bruker NIST 2020 MSMS Spectral Library_hr	10210	8.1	-0.474	-2.406	823.2	0	10161
4-acetamidobutanoate	0.9	144.066	145.074	[M-H]-, [M-H-H2O]-	C6H11NO3	Spectral Library - MoNA-export-GNPS.msp, Spectral Library - MoNA-export-GNPS.msp	20210	3.1	-0.134	-0.928	821.8	0	84623
(2E)-4-Hydroxynon-2-enoic acid	9.84	171.103	172.11	[M-H]-	C9H16O3	Spectral Library - Bruker NIST 2020 MSMS Spectral Library_hr, Spectral Library - Bruker NIST 2020 MSMS Spectral Library_hr	20210	8	0.007	0.04	821.6	0	4753
Methyl octadecadienoate	15.85	295.262	294.255	[M+H]+	C19H34O2	Spectral Library - Bruker NIST 2020 MSMS Spectral Library_hr, Spectral Library - Bruker NIST 2020 MSMS Spectral Library_hr	10110	22	-1.074	-3.639	821.3	2619	18663
8,3'-Dihydroxy-5,7,4'-trimethoxyflavone	11.1	345.097	344.09	[M+H]+, [M+H-H2O]+	C18H16O7	Spectral Library - Bruker MetaboBASE Personal Library 2.0_in-silico, Spectral Library - Bruker MetaboBASE Personal Library 2.0_in-silico, Spectral Library - Bruker MetaboBASE Personal Library 2.0_in-silico, Spectral Library - Bruker MetaboBASE Personal Library 2.0_in-silico, Spectral Library - Bruker MetaboBASE Personal Library 2.0_in-silico, Spectral Library - Bruker MetaboBASE Personal Library …	20210	4.8	-0.013	-0.037	819.8	97	258307
Caffeic Acid	10.77	163.039	180.042	[M+H-H2O]+, [M+H]+	C9H8O4	Spectral Library - Bruker NIST 2020 MSMS Spectral Library_hr, Spectral Library - Bruker NIST 2020 MSMS Spectral Library_hr	20210	7.2	0.02	0.122	819.7	0	20320
Methyl 1-aminocyclopropanecarboxylate	1.97	116.071	115.063	[M+H]+, [M+Na]+	C5H9NO2	Spectral Library - Bruker NIST 2020 MSMS Spectral Library_hr, Spectral Library - Bruker NIST 2020 MSMS Spectral Library_hr	20210	5	-0.062	-0.531	807.1	151	14931
Atropic acid	8.51	147.045	148.052	[M-H]-	C9H8O2	Spectral Library - Bruker NIST 2020 MSMS Spectral Library_hr, Spectral Library - Bruker NIST 2020 MSMS Spectral Library_hr, Spectral Library - Bruker NIST 2020 MSMS Spectral Library_hr	10210	4.9	-0.618	-4.206	802.3	0	2043
Undecanedioic acid	11.76	215.129	216.136	[M-H]-	C11H20O4	Spectral Library - Bruker NIST 2020 MSMS Spectral Library_hr, Spectral Library - Bruker NIST 2020 MSMS Spectral Library_hr	20110	20.4	-0.109	-0.508	799.5	1162	4364
Pectolinarigenin	13.15	315.086	314.079	[M+H]+, [M+Na]+	C17H14O6	Spectral Library - Bruker NIST 2020 MSMS Spectral Library_hr, Spectral Library - Bruker NIST 2020 MSMS Spectral Library_hr	20210	7.4	-0.029	-0.091	792.2	194	113493
3-Oxocyclobutanecarboxylic acid	2.03	113.024	114.032	[M-H]-	C5H6O3	Spectral Library - Bruker NIST 2020 MSMS Spectral Library_hr, Spectral Library - Bruker NIST 2020 MSMS Spectral Library_hr	20010	∞	-0.002	-0.018	789.3	0	763
Nomilin	13.58	513.213	514.22	[M-H]-, [M+H]+, [M+Na]+	C28H34O9	Spectral Library - Bruker MetaboBASE Personal Library 3.0, Spectral Library - Bruker MetaboBASE Personal Library 3.0	20110	73.6	0.021	0.041	788.5	0	4908
Myricetin 3,7,3'-trimethyl ether	9.94	361.092	360.084	[M+H]+, [M+Na]+	C18H16O8	Spectral Library - Bruker MetaboBASE Personal Library 2.0_in-silico, Spectral Library - Bruker MetaboBASE Personal Library 2.0_in-silico, Spectral Library - Bruker MetaboBASE Personal Library 2.0_in-silico, Spectral Library - Bruker MetaboBASE Personal Library 2.0_in-silico, Spectral Library - Bruker MetaboBASE Personal Library 2.0_in-silico, Spectral Library - Bruker MetaboBASE Personal Library …	20210	3.2	-0.144	-0.399	783.9	0	39085
Vanillic acid	1.03	167.035	168.042	[M-H]-	C8H8O4	Spectral Library - Bruker Sumner MetaboBASE Plant Library - confirmed standards, Spectral Library - Bruker Sumner MetaboBASE Plant Library - confirmed standards	20210	9.2	-0.122	-0.732	772.9	0	1970
7,8-Dihydroxycoumarin	6.56	177.019	178.026	[M-H]-	C9H6O4	Spectral Library - Bruker NIST 2020 MSMS Spectral Library_hr, Spectral Library - Bruker NIST 2020 MSMS Spectral Library_hr	20110	22.5	-0.2	-1.131	770.1	0	18787
3-Hydroxybenzaldehyde	6.2	121.029	122.037	[M-H]-	C7H6O2	Spectral Library - Bruker NIST 2020 MSMS Spectral Library_hr, Spectral Library - Bruker NIST 2020 MSMS Spectral Library_hr	10210	10	-0.277	-2.29	769.3	0	18543
3,4'-Dimethoxy-5,7,3'-trihydroxyflavone	12.5	329.067	330.074	[M-H]-	C17H14O7	Spectral Library - Bruker NIST 2020 MSMS Spectral Library_hr, Spectral Library - Bruker NIST 2020 MSMS Spectral Library_hr, Spectral Library - Bruker NIST 2020 MSMS Spectral Library_hr, Spectral Library - Bruker NIST 2020 MSMS Spectral Library_hr, Spectral Library - Bruker NIST 2020 MSMS Spectral Library_hr, Spectral Library - Bruker NIST 2020 MSMS Spectral Library_hr, Spectral Library - Bruker N…	20210	0.9	0.276	0.839	768.5	0	33593
Adenine	1.83	136.062	135.054	[M+H]+	C5H5N5	Spectral Library - Bruker NIST 2020 MSMS Spectral Library_hr, Spectral Library - Bruker NIST 2020 MSMS Spectral Library_hr	20010	∞	-0.063	-0.464	767.7	61	6901
5-methyl-N-propyl-4,5,6,7-tetrahydro-1H-indazole-3-carboxamide	9.59	222.16	221.153	[M+H]+	C12H19N3O	Spectral Library - Bruker MetaboBASE Personal Library 3.0, Spectral Library - Bruker MetaboBASE Personal Library 3.0	20210	8.7	-0.159	-0.716	767.3	0	3869
DL-Malic acid	0.98	133.014	134.021	[M-H]-	C4H6O5	Spectral Library - Bruker NIST 2020 MSMS Spectral Library_hr, Spectral Library - Bruker NIST 2020 MSMS Spectral Library_hr	10210	16.6	-0.417	-3.133	761.1	128	2743
(-)-Myrtenal	10.15	133.101	150.105	[M+H-H2O]+, [M+H]+	C10H14O	Spectral Library - Bruker NIST 2020 MSMS Spectral Library_hr, Spectral Library - Bruker NIST 2020 MSMS Spectral Library_hr, Spectral Library - Bruker NIST 2020 MSMS Spectral Library_hr, Spectral Library - Bruker NIST 2020 MSMS Spectral Library_hr, Spectral Library - Bruker NIST 2020 MSMS Spectral Library_hr, Spectral Library - Bruker NIST 2020 MSMS Spectral Library_hr, Spectral Library - Bruker N…	20210	3	0.185	1.392	760.8	200	6420
ESCULETIN	6.51	179.034	178.027	[M+H]+	C9H6O4	Spectral Library - Bruker NIST 2020 MSMS Spectral Library_hr, Spectral Library - Bruker NIST 2020 MSMS Spectral Library_hr, Spectral Library - Bruker NIST 2020 MSMS Spectral Library_hr	20210	15.5	-0.017	-0.096	757.5	0	6971
Linoleoyl Ethanolamide	16.89	324.289	323.282	[M+H]+	C20H37NO2	Spectral Library - Bruker NIST 2020 MSMS Spectral Library_hr, Spectral Library - Bruker NIST 2020 MSMS Spectral Library_hr	20110	78.4	-0.209	-0.643	756.9	0	9454
4-[5-(4-Hydroxy-3-methoxyphenyl)-3,4-dimethyloxolan-2-yl]-2-methoxyphenol	13.23	343.156	344.164	[M-H]-	C20H24O5	Spectral Library - Bruker NIST 2020 MSMS Spectral Library_hr, Spectral Library - Bruker NIST 2020 MSMS Spectral Library_hr	10110	68.9	1.152	3.358	749.7	0	668
Salvianolic acid B	6.94	358.069	718.153	[M-H-H]2-	C36H30O16	Spectral Library - Bruker NIST 2020 MSMS Spectral Library_hr, Spectral Library - Bruker NIST 2020 MSMS Spectral Library_hr	20110	103.4	-0.026	-0.073	744.8	0	4797
3-(2-Hydroxybutan-2-yl)-5-oxooxolane-3-carboxylic acid	4.04	201.077	202.084	[M-H]-	C9H14O5	Spectral Library - Bruker NIST 2020 MSMS Spectral Library_hr, Spectral Library - Bruker NIST 2020 MSMS Spectral Library_hr	20210	12.3	-0.347	-1.728	740.9	0	1568
10-Deacetylbaccatin III	12.21	543.223	544.23	[M-H]-, [M+H]+, [M+Na]+	C29H36O10	Spectral Library - Bruker MetaboBASE Personal Library 3.0, Spectral Library - Bruker MetaboBASE Personal Library 3.0	20110	55.8	-0.578	-1.064	739.4	0	2948
Tormentic acid	14.44	487.343	488.35	[M-H]-	C30H48O5	Spectral Library - Bruker NIST 2020 MSMS Spectral Library_hr, Spectral Library - Bruker NIST 2020 MSMS Spectral Library_hr, Spectral Library - Bruker NIST 2020 MSMS Spectral Library_hr, Spectral Library - Bruker NIST 2020 MSMS Spectral Library_hr, Spectral Library - Bruker NIST 2020 MSMS Spectral Library_hr	20210	13.4	0.077	0.158	736.7	0	393162
Luteolin-4'-O-glucoside	10.12	447.093	448.1	[M-H]-, [M+Na]+, [M+H]+	C21H20O11	Spectral Library - Bruker Sumner MetaboBASE Plant Library - confirmed standards, Spectral Library - Bruker Sumner MetaboBASE Plant Library - confirmed standards, Spectral Library - Bruker Sumner MetaboBASE Plant Library - confirmed standards, Spectral Library - Bruker Sumner MetaboBASE Plant Library - confirmed standards	20110	22.3	-0.153	-0.343	730.3	0	2892
3-(3,4-Dihydroxyphenyl)pyruvate	3.37	195.03	196.037	[M-H]-	C9H8O5	Spectral Library - Bruker MetaboBASE Personal Library 3.0, Spectral Library - Bruker MetaboBASE Personal Library 3.0, Spectral Library - Bruker MetaboBASE Personal Library 3.0	20210	17	0.075	0.386	729.3	0	1179
Crotonic acid	0.65	87.0441	86.0368	[M+H]+	C4H6O2	Spectral Library - Bruker NIST 2020 MSMS Spectral Library_hr, Spectral Library - Bruker NIST 2020 MSMS Spectral Library_hr	20110	33.4	0.02	0.232	729.3	0	3333
3-Methyl-4-nitrophenol	11.19	152.036	153.043	[M-H]-	C7H7NO3	Spectral Library - Bruker NIST 2020 MSMS Spectral Library_hr, Spectral Library - Bruker NIST 2020 MSMS Spectral Library_hr	20010	∞	0.259	1.705	724.9	222	3301
[6]-Dehydrogingerdione	14.67	289.146	290.153	[M-H]-	C17H22O4	Spectral Library - Bruker MetaboBASE Personal Library 3.0, Spectral Library - Bruker MetaboBASE Personal Library 3.0	10210	18	0.975	3.373	724.3	0	4800
2-(1',2',3',4'-Tetrahydroxybutyl)quinoxaline	7.88	251.103	250.095	[M+H]+	C12H14N2O4	Spectral Library - Bruker NIST 2020 MSMS Spectral Library_hr, Spectral Library - Bruker NIST 2020 MSMS Spectral Library_hr	20110	38	-0.032	-0.128	723	0	5768
Leu Pro Ser	5.54	316.187	315.179	[M+H]+, [M+Na]+	C14H25N3O5	Spectral Library - Bruker MetaboBASE Personal Library 2.0_in-silico, Spectral Library - Bruker MetaboBASE Personal Library 2.0_in-silico, Spectral Library - Bruker MetaboBASE Personal Library 2.0_in-silico, Spectral Library - Bruker MetaboBASE Personal Library 2.0_in-silico, Spectral Library - Bruker MetaboBASE Personal Library 2.0_in-silico	20110	28.3	-0.098	-0.31	714.2	0	2727
Quinolin-7-ol	9.13	144.045	145.053	[M-H]-	C9H7NO	Spectral Library - Bruker NIST 2020 MSMS Spectral Library_hr, Spectral Library - Bruker NIST 2020 MSMS Spectral Library_hr, Spectral Library - Bruker NIST 2020 MSMS Spectral Library_hr, Spectral Library - Bruker NIST 2020 MSMS Spectral Library_hr, Spectral Library - Bruker NIST 2020 MSMS Spectral Library_hr, Spectral Library - Bruker NIST 2020 MSMS Spectral Library_hr	20210	5.2	-0.183	-1.268	714	0	42334
Palmatine	11.58	352.154	351.147	[M+H]+	C21H21NO4	Spectral Library - Bruker MetaboBASE Personal Library 3.0, Spectral Library - Bruker MetaboBASE Personal Library 3.0	20210	3.4	-0.084	-0.239	713.1	0	68669
Stearic Acid ethyl ester	18.56	311.296	312.303	[M-H]-	C20H40O2	Spectral Library - Bruker MetaboBASE Personal Library 3.0, Spectral Library - Bruker MetaboBASE Personal Library 3.0, Spectral Library - Bruker MetaboBASE Personal Library 3.0	20110	22	0.173	0.555	712.2	5891	13771
Bonaniol A	14.24	423.182	424.189	[M-H]-	C25H28O6	Spectral Library - Bruker NIST 2020 MSMS Spectral Library_hr, Spectral Library - Bruker NIST 2020 MSMS Spectral Library_hr	20110	33.7	0.615	1.454	701.3	0	6898
(±)-Furaneol	8.92	129.054	128.047	[M+H]+	C6H8O3	Spectral Library - Bruker MetaboBASE Personal Library 2.0_in-silico, Spectral Library - Bruker MetaboBASE Personal Library 2.0_in-silico	20210	9.2	-0.22	-1.706	700.8	0	11233
Vigabatrin	2.79	130.086	129.079	[M+H]+	C6H11NO2	Spectral Library - Bruker NIST 2020 MSMS Spectral Library_hr, Spectral Library - Bruker NIST 2020 MSMS Spectral Library_hr, Spectral Library - Bruker NIST 2020 MSMS Spectral Library_hr	20210	5.6	-0.02	-0.152	698.6	199	25652
1H-Indole-3-propanoic acid	12.49	188.072	189.079	[M-H]-	C11H11NO2	Spectral Library - Bruker NIST 2020 MSMS Spectral Library_hr, Spectral Library - Bruker NIST 2020 MSMS Spectral Library_hr, Spectral Library - Bruker NIST 2020 MSMS Spectral Library_hr	20110	29.6	0.331	1.758	696.3	0	5765
2-Hydroxychavicol	10.88	149.061	150.068	[M-H]-	C9H10O2	Spectral Library - Bruker MetaboBASE Personal Library 3.0, Spectral Library - Bruker MetaboBASE Personal Library 3.0	20010	∞	-0.03	-0.199	693.3	39	2569
(2alpha,5beta,10beta,13alpha)-4,10-Diacetoxy-1,7,13-trihydroxy-9-oxo-5,20-epoxytax-11-en-2-yl benzoate	12.76	585.235	586.242	[M-H]-	C31H38O11	Spectral Library - Bruker MetaboBASE Personal Library 3.0, Spectral Library - Bruker MetaboBASE Personal Library 3.0	20210	5.6	0.572	0.978	684.7	0	11476
Pheophorbide a	16.79	593.275	592.268	[M+H]+, [M+Na]+	C35H36N4O5	Spectral Library - Bruker NIST 2020 MSMS Spectral Library_hr, Spectral Library - Bruker NIST 2020 MSMS Spectral Library_hr	20110	26	-0.989	-1.667	681.3	0	21844
5,3',4',5'-Tetrahydroxy-6,7-dimethoxyflavone	9.92	347.076	346.069	[M+H]+, [M+H-H2O]+, [M+Na]+	C17H14O8	Spectral Library - Bruker MetaboBASE Personal Library 2.0_in-silico, Spectral Library - Bruker MetaboBASE Personal Library 2.0_in-silico, Spectral Library - Bruker MetaboBASE Personal Library 2.0_in-silico, Spectral Library - Bruker MetaboBASE Personal Library 2.0_in-silico, Spectral Library - Bruker MetaboBASE Personal Library 2.0_in-silico, Spectral Library - Bruker MetaboBASE Personal Library …	20210	15	-0.124	-0.357	679.2	0	43230
Caffeic acid methylester	9.16	195.065	194.058	[M+H]+	C10H10O4	Spectral Library - Bruker NIST 2020 MSMS Spectral Library_hr, Spectral Library - Bruker NIST 2020 MSMS Spectral Library_hr, Spectral Library - Bruker NIST 2020 MSMS Spectral Library_hr, Spectral Library - Bruker NIST 2020 MSMS Spectral Library_hr	20110	37.1	-0.17	-0.869	667.3	129	3781
(-)-Quinic acid	0.62	191.056	192.063	[M-H]-	C7H12O6	Spectral Library - Bruker NIST 2020 MSMS Spectral Library_hr, Spectral Library - Bruker NIST 2020 MSMS Spectral Library_hr	20210	10.2	-0.113	-0.591	666.6	0	377386
5-HYDROXY-2',4',7,8-TETRAMETHOXYFLAVONE	13.42	359.112	358.105	[M+H]+, [M+Na]+	C19H18O7	Spectral Library - Bruker MetaboBASE Personal Library 3.0, Spectral Library - Bruker MetaboBASE Personal Library 3.0, Spectral Library - Bruker MetaboBASE Personal Library 3.0	20210	3.5	-0.072	-0.199	664.4	0	139998
Aflatoxin G2	11.11	331.081	330.074	[M+H]+, [M+H-H2O]+	C17H14O7	Spectral Library - Bruker NIST 2020 MSMS Spectral Library_hr, Spectral Library - Bruker NIST 2020 MSMS Spectral Library_hr	20210	2.1	-0.02	-0.061	661.6	0	168076
4-Oxododecanedioic acid	9.71	243.124	244.131	[M-H]-	C12H20O5	Spectral Library - Bruker NIST 2020 MSMS Spectral Library_hr, Spectral Library - Bruker NIST 2020 MSMS Spectral Library_hr	20010	∞	0.125	0.515	659.8	54	2928
D-Gluconic acid, .delta.-lactone	0.71	177.04	178.047	[M-H]-	C6H10O6	Spectral Library - Bruker NIST 2020 MSMS Spectral Library_hr, Spectral Library - Bruker NIST 2020 MSMS Spectral Library_hr	20010	∞	-0.25	-1.414	659.6	46	1466
Mianserin 2-oxide	8.67	281.165	280.157	[M+H]+	C18H20N2O	Spectral Library - Bruker MetaboBASE Personal Library 2.0_in-silico, Spectral Library - Bruker MetaboBASE Personal Library 2.0_in-silico	20110	39.3	-0.115	-0.41	658.6	0	9860
(3E)-4-(1-Hydroxy-2,2,6-trimethyl-4-oxocyclohexyl)but-3-en-2-yl hexopyranoside	9.5	387.202	388.209	[M-H]-, [M+H-H2O]+, [M+Na]+, [M+HCOOH-H]-	C19H32O8	Spectral Library - Bruker NIST 2020 MSMS Spectral Library_hr, Spectral Library - Bruker NIST 2020 MSMS Spectral Library_hr, Spectral Library - Bruker NIST 2020 MSMS Spectral Library_hr	20210	3.5	-0.538	-1.389	657.6	0	5288
Dicyclomine	16.65	310.274	309.267	[M+H]+	C19H35NO2	Spectral Library - Bruker NIST 2020 MSMS Spectral Library_hr, Spectral Library - Bruker NIST 2020 MSMS Spectral Library_hr	20210	3	0.004	0.013	655.8	129	21860
2-Hexylpentanedioic acid	12.45	215.129	216.137	[M-H]-	C11H20O4	Spectral Library - Bruker NIST 2020 MSMS Spectral Library_hr, Spectral Library - Bruker NIST 2020 MSMS Spectral Library_hr	10210	9	0.466	2.168	655.7	0	5742
methyl 4-[(4-hydroxyoxan-4-yl)methylcarbamoyl]benzoate	10.63	294.134	293.126	[M+H]+, [M+Na]+, [M-H]-	C15H19NO5	Spectral Library - Bruker MetaboBASE Personal Library 3.0, Spectral Library - Bruker MetaboBASE Personal Library 3.0	20210	13.6	0.044	0.15	651.5	0	6730
N-trans-Feruloyloctopamine	9.96	328.118	329.125	[M-H]-	C18H19NO5	Spectral Library - Bruker NIST 2020 MSMS Spectral Library_hr, Spectral Library - Bruker NIST 2020 MSMS Spectral Library_hr	10110	29.7	-0.87	-2.652	650.2	0	2819
(??)13-AZAPROSTANOIC ACID	17.11	312.29	311.282	[M+H]+	C19H37NO2	Spectral Library - Bruker MetaboBASE Personal Library 3.0, Spectral Library - Bruker MetaboBASE Personal Library 3.0, Spectral Library - Bruker MetaboBASE Personal Library 3.0	20210	19.5	-0.124	-0.397	641.7	257	9653
2-Isopropylmalic acid	1.05	175.061	176.068	[M-H]-	C7H12O5	Spectral Library - Bruker NIST 2020 MSMS Spectral Library_hr, Spectral Library - Bruker NIST 2020 MSMS Spectral Library_hr	10210	7.6	-0.364	-2.079	633.7	0	3517
Allose	10.04	179.055	180.063	[M-H]-	C6H12O6	Spectral Library - MoNA-export-GNPS.msp, Spectral Library - MoNA-export-GNPS.msp, Spectral Library - MoNA-export-GNPS.msp	10110	1000	-0.78	-4.358	630.9	0	727
9-SAHSA	16.74	565.519	566.527	[M-H]-	C36H70O4	Spectral Library - Bruker MetaboBASE Personal Library 3.0, Spectral Library - Bruker MetaboBASE Personal Library 3.0, Spectral Library - Bruker MetaboBASE Personal Library 3.0	20110	79	-0.796	-1.408	630	900	5717
4-Aminohexanoic acid	6.29	114.091	131.095	[M+H-H2O]+, [M+H]+	C6H13NO2	Spectral Library - Bruker NIST 2020 MSMS Spectral Library_hr, Spectral Library - Bruker NIST 2020 MSMS Spectral Library_hr	20210	6.4	-0.052	-0.456	627.2	0	86606
Isopropenyl acetate	8.58	101.06	100.052	[M+H]+	C5H8O2	Spectral Library - Bruker MetaboBASE Personal Library 2.0_in-silico, Spectral Library - Bruker MetaboBASE Personal Library 2.0_in-silico	20210	17.5	-0.097	-0.96	625.4	575	6609
3-Indoleacetic Acid	8.27	174.056	175.063	[M-H]-, [M+Na]+, [M+H]+	C10H9NO2	Spectral Library - Bruker NIST 2020 MSMS Spectral Library_hr, Spectral Library - Bruker NIST 2020 MSMS Spectral Library_hr	20210	9	-0.276	-1.584	622.9	0	10364
9-Hydroxynonanoic acid	10.19	173.118	174.125	[M-H]-	C9H18O3	Spectral Library - Bruker NIST 2020 MSMS Spectral Library_hr, Spectral Library - Bruker NIST 2020 MSMS Spectral Library_hr	20210	6.9	-0.11	-0.633	621.8	129	3736
2-Methyl-1,3-cyclohexadiene	8.91	95.0856	94.0783	[M+H]+	C7H10	Spectral Library - Bruker MetaboBASE Personal Library 2.0_in-silico, Spectral Library - Bruker MetaboBASE Personal Library 2.0_in-silico, Spectral Library - Bruker MetaboBASE Personal Library 2.0_in-silico	20210	1.5	0.042	0.445	618	382	8165
(Z)-3,7-Dimethyl-2,7-octadienyl propionate	12.05	211.169	210.162	[M+H]+, [M+Na]+, [M+H-H2O]+	C13H22O2	Spectral Library - Bruker MetaboBASE Personal Library 2.0_in-silico, Spectral Library - Bruker MetaboBASE Personal Library 2.0_in-silico, Spectral Library - Bruker MetaboBASE Personal Library 2.0_in-silico, Spectral Library - Bruker MetaboBASE Personal Library 2.0_in-silico, Spectral Library - Bruker MetaboBASE Personal Library 2.0_in-silico, Spectral Library - Bruker MetaboBASE Personal Library …	20110	1000	-0.374	-1.77	616.5	163	8207
3-Furancarboxylic acid, tetrahydro-4-methylene-2-octyl-5-oxo-, (2R,3S)-rel-	11.44	255.159	254.152	[M+H]+, [M+Na]+	C14H22O4	Spectral Library - Bruker NIST 2020 MSMS Spectral Library_hr, Spectral Library - Bruker NIST 2020 MSMS Spectral Library_hr, Spectral Library - Bruker NIST 2020 MSMS Spectral Library_hr	20210	4.4	-0.099	-0.39	613.5	197	19140
(Z)-2-Oct-7-enylpent-2-enedioic acid	10.35	241.144	240.136	[M+H]+, [M+Na]+	C13H20O4	Spectral Library - Bruker NIST 2020 MSMS Spectral Library_hr, Spectral Library - Bruker NIST 2020 MSMS Spectral Library_hr	20210	13.7	0.136	0.564	608.7	0	12866
7-Hydroxychromanone	9.17	165.055	164.047	[M+H]+	C9H8O3	Spectral Library - Bruker NIST 2020 MSMS Spectral Library_hr, Spectral Library - Bruker NIST 2020 MSMS Spectral Library_hr	20210	8.7	-0.001	-0.004	599.5	105	1949
(+)-NICOTINE	11.41	385.093	386.1	[M-H]-	C20H18O8	Spectral Library - Bruker MetaboBASE Personal Library 3.0, Spectral Library - Bruker MetaboBASE Personal Library 3.0	20110	43.7	-0.365	-0.947	596.9	0	5849
Methyl propenyl ketone	10.48	85.0649	84.0576	[M+H]+	C5H8O	Spectral Library - Bruker MetaboBASE Personal Library 3.0, Spectral Library - Bruker MetaboBASE Personal Library 3.0	20010	∞	0.089	1.052	596.8	329	7895
2-(Hydroxymethyl)-6-methylpyridin-3-ol	8.01	138.056	139.064	[M-H]-	C7H9NO2	Spectral Library - Bruker NIST 2020 MSMS Spectral Library_hr, Spectral Library - Bruker NIST 2020 MSMS Spectral Library_hr	10010	∞	0.387	2.803	596.7	0	934
3-Hydroxy-beta-ionone	11.48	209.154	208.146	[M+H]+, [M+H-H2O]+, [M+Na]+	C13H20O2	Spectral Library - Bruker MetaboBASE Personal Library 2.0_in-silico, Spectral Library - Bruker MetaboBASE Personal Library 2.0_in-silico, Spectral Library - Bruker MetaboBASE Personal Library 2.0_in-silico, Spectral Library - Bruker MetaboBASE Personal Library 2.0_in-silico, Spectral Library - Bruker MetaboBASE Personal Library 2.0_in-silico, Spectral Library - Bruker MetaboBASE Personal Library …	20210	10.8	0.063	0.3	592.1	215	39112
5-Androsten-3.beta.,16.alpha.-diol-17-one	14.2	305.21	304.203	[M+H]+	C19H28O3	Spectral Library - Bruker NIST 2020 MSMS Spectral Library_hr, Spectral Library - Bruker NIST 2020 MSMS Spectral Library_hr, Spectral Library - Bruker NIST 2020 MSMS Spectral Library_hr, Spectral Library - Bruker NIST 2020 MSMS Spectral Library_hr, Spectral Library - Bruker NIST 2020 MSMS Spectral Library_hr, Spectral Library - Bruker NIST 2020 MSMS Spectral Library_hr, Spectral Library - Bruker N…	10110	39.3	-0.65	-2.131	591.7	0	9704
5-Ethyl-5-(propan-2-yl)imidazolidine-2,4-dione	3.06	171.113	170.106	[M+H]+	C8H14N2O2	Spectral Library - Bruker NIST 2020 MSMS Spectral Library_hr, Spectral Library - Bruker NIST 2020 MSMS Spectral Library_hr	20010	∞	0.036	0.212	590	0	1158
(5alpha,8beta,9beta)-5,9-Epoxy-3,6-megastigmadien-8-ol	11.69	209.154	208.146	[M+H]+	C13H20O2	Spectral Library - Bruker MetaboBASE Personal Library 2.0_in-silico, Spectral Library - Bruker MetaboBASE Personal Library 2.0_in-silico	20210	7.9	-0.013	-0.06	587	274	9266
Dimethyl suberate	13.25	203.128	202.12	[M+H]+, [M+H-H2O]+	C10H18O4	Spectral Library - Bruker NIST 2020 MSMS Spectral Library_hr, Spectral Library - Bruker NIST 2020 MSMS Spectral Library_hr, Spectral Library - Bruker NIST 2020 MSMS Spectral Library_hr	20210	8.6	0.051	0.249	584.4	726	13987
2-Methoxybenzoic acid	4.51	151.04	152.047	[M-H]-	C8H8O3	Spectral Library - Bruker NIST 2020 MSMS Spectral Library_hr, Spectral Library - Bruker NIST 2020 MSMS Spectral Library_hr, Spectral Library - Bruker NIST 2020 MSMS Spectral Library_hr	10010	∞	-0.305	-2.018	583.7	0	1791
Phenol, 4-[2-[2,6-dimethoxy-4-(2-propen-1-yl)phenoxy]-1-methoxypropyl]-2-methoxy-	12.37	387.18	388.187	[M-H]-	C22H28O6	Spectral Library - Bruker NIST 2020 MSMS Spectral Library_hr, Spectral Library - Bruker NIST 2020 MSMS Spectral Library_hr	10010	∞	-1.108	-2.862	582.9	0	711
9-[2-(4-Morpholinyl)ethyl]-9H-purin-6-ylamine	10.15	249.146	248.139	[M+H]+	C11H16N6O	Spectral Library - Bruker NIST 2020 MSMS Spectral Library_hr, Spectral Library - Bruker NIST 2020 MSMS Spectral Library_hr	20110	23.7	0.364	1.461	581.5	0	38262
2-Pyrrolidinone	4.51	86.0601	85.0528	[M+H]+	C4H7NO	Spectral Library - Bruker MetaboBASE Personal Library 2.0_in-silico, Spectral Library - Bruker MetaboBASE Personal Library 2.0_in-silico	20210	2.6	0.039	0.448	580.2	331	172729
Oxandrolone	15.38	307.226	306.219	[M+H]+, [M+Na]+	C19H30O3	Spectral Library - Bruker MetaboBASE Personal Library 3.0, Spectral Library - Bruker MetaboBASE Personal Library 3.0	10110	27.9	-0.917	-2.984	579.8	2148	20619
15-Oxo-11Z,13E-eicosadienoic acid	15.85	323.257	322.25	[M+H]+, [M+Na]+	C20H34O3	Spectral Library - Bruker NIST 2020 MSMS Spectral Library_hr, Spectral Library - Bruker NIST 2020 MSMS Spectral Library_hr, Spectral Library - Bruker NIST 2020 MSMS Spectral Library_hr	10210	17.1	-1.076	-3.329	579.7	3449	23594
Methyl (R)-(+)-2,2-dimethyl-1,3-dioxolane-4-carboxylate	8.6	161.081	160.073	[M+H]+	C7H12O4	Spectral Library - Bruker NIST 2020 MSMS Spectral Library_hr, Spectral Library - Bruker NIST 2020 MSMS Spectral Library_hr	20110	23.6	-0.062	-0.388	577.1	315	7088
Oxadixyl	9.39	279.134	278.127	[M+H]+	C14H18N2O4	Spectral Library - Bruker NIST 2020 MSMS Spectral Library_hr, Spectral Library - Bruker NIST 2020 MSMS Spectral Library_hr	20210	11.4	-0.14	-0.501	570.3	0	10540
3-Coumaric acid	4.36	163.04	164.047	[M-H]-	C9H8O3	Spectral Library - Bruker NIST 2020 MSMS Spectral Library_hr, Spectral Library - Bruker NIST 2020 MSMS Spectral Library_hr	20210	12.1	-0.221	-1.354	570.1	0	10707
FISSINOLIDE	13.69	511.234	512.242	[M-H]-, [M+Cl]-, [M+HCOOH-H]-	C29H36O8	Spectral Library - Bruker MetaboBASE Personal Library 3.0, Spectral Library - Bruker MetaboBASE Personal Library 3.0	20210	3.7	0.368	0.719	569.8	0	19410
1-Methylpiperidine-3-carboxylic acid	5.32	144.102	143.095	[M+H]+	C7H13NO2	Spectral Library - Bruker NIST 2020 MSMS Spectral Library_hr, Spectral Library - Bruker NIST 2020 MSMS Spectral Library_hr, Spectral Library - Bruker NIST 2020 MSMS Spectral Library_hr	20210	5	-0.015	-0.104	568.2	62	102897
13S-Hydroxy-9Z,11E,15Z-octadecatrienoic acid	14.72	293.213	294.22	[M-H]-, [M-H-H2O]-	C18H30O3	Spectral Library - Bruker NIST 2020 MSMS Spectral Library_hr, Spectral Library - Bruker NIST 2020 MSMS Spectral Library_hr, Spectral Library - Bruker NIST 2020 MSMS Spectral Library_hr	10210	17	0.73	2.491	556.8	738	64472
4-Ipomeanol	2.9	167.071	168.079	[M-H]-	C9H12O3	Spectral Library - Bruker MetaboBASE Personal Library 3.0, Spectral Library - Bruker MetaboBASE Personal Library 3.0	20210	14.9	-0.123	-0.738	555.8	0	1889
4-Hydroxy-4-[(E)-3-hydroxybut-1-enyl]-3,5,5-trimethylcyclohex-2-en-1-one	8.1	207.138	224.141	[M+H-H2O]+, [M+H]+	C13H20O3	Spectral Library - Bruker NIST 2020 MSMS Spectral Library_hr, Spectral Library - Bruker NIST 2020 MSMS Spectral Library_hr	20010	∞	-0.034	-0.164	554.4	0	15995
Glutaric acid	1.41	115.039	132.042	[M+H-H2O]+, [M+H]+, [M+Na]+	C5H8O4	Spectral Library - Bruker NIST 2020 MSMS Spectral Library_hr, Spectral Library - Bruker NIST 2020 MSMS Spectral Library_hr	20210	10.9	-0.133	-1.159	550	2142	13614
Bisacumol	12.85	219.174	218.167	[M+H]+	C15H22O	Spectral Library - Bruker MetaboBASE Personal Library 2.0_in-silico, Spectral Library - Bruker MetaboBASE Personal Library 2.0_in-silico	20210	6.6	-0.02	-0.09	548.9	76	26915
1,6-Anhydro-.beta.-D-glucose	0.73	161.046	162.053	[M-H]-	C6H10O5	Spectral Library - Bruker NIST 2020 MSMS Spectral Library_hr, Spectral Library - Bruker NIST 2020 MSMS Spectral Library_hr, Spectral Library - Bruker NIST 2020 MSMS Spectral Library_hr	20010	∞	0.156	0.971	548.2	616	2889
Diffractaic acid	10.52	373.13	374.138	[M-H]-	C20H22O7	Spectral Library - Bruker NIST 2020 MSMS Spectral Library_hr, Spectral Library - Bruker NIST 2020 MSMS Spectral Library_hr	10110	64.9	1.063	2.849	548.1	0	1793
1-(4-Methylphenyl)acetone	11.31	149.096	148.089	[M+H]+	C10H12O	Spectral Library - Bruker NIST 2020 MSMS Spectral Library_hr, Spectral Library - Bruker NIST 2020 MSMS Spectral Library_hr, Spectral Library - Bruker NIST 2020 MSMS Spectral Library_hr	20210	15.4	0.009	0.059	547.1	230	7142
1H-Indole-3-carboxylic acid, 1-pentyl-	10.27	232.133	231.126	[M+H]+, [M+Na]+, [M-H]-	C14H17NO2	Spectral Library - Bruker NIST 2020 MSMS Spectral Library_hr, Spectral Library - Bruker NIST 2020 MSMS Spectral Library_hr	20210	20	0.15	0.645	544	0	20046
N,2-Dihydroxybenzenecarboximidic acid	6.72	152.035	153.043	[M-H]-, [M+H]+	C7H7NO3	Spectral Library - Bruker NIST 2020 MSMS Spectral Library_hr, Spectral Library - Bruker NIST 2020 MSMS Spectral Library_hr	20010	∞	-0.076	-0.497	542	0	930
Methyl salicylate	8.21	153.055	152.047	[M+H]+	C8H8O3	Spectral Library - Bruker MetaboBASE Personal Library 2.0_in-silico, Spectral Library - Bruker MetaboBASE Personal Library 2.0_in-silico	20110	27.9	-0.086	-0.559	541	255	4791
Eupatocunin	12.37	405.19	404.183	[M+H]+, [M+Na]+	C22H28O7	Spectral Library - Bruker MetaboBASE Personal Library 2.0_in-silico, Spectral Library - Bruker MetaboBASE Personal Library 2.0_in-silico, Spectral Library - Bruker MetaboBASE Personal Library 2.0_in-silico	20110	34.3	-0.277	-0.683	540.8	0	13193
PSICOSE	10.48	179.056	180.064	[M-H]-	C6H12O6	Spectral Library - MoNA-export-GNPS.msp, Spectral Library - MoNA-export-GNPS.msp, Spectral Library - MoNA-export-GNPS.msp	20110	34.7	0.272	1.52	533.4	0	1657
Feruloylagmatine	9.27	307.176	306.169	[M+H]+	C15H22N4O3	Spectral Library - Bruker MetaboBASE Personal Library 2.0_in-silico, Spectral Library - Bruker MetaboBASE Personal Library 2.0_in-silico	20110	26.4	-0.209	-0.68	533	0	9930
1-Acetyl-4-piperidinecarboxylic acid	1.94	172.097	171.089	[M+H]+	C8H13NO3	Spectral Library - Bruker NIST 2020 MSMS Spectral Library_hr, Spectral Library - Bruker NIST 2020 MSMS Spectral Library_hr	20210	17.6	-0.052	-0.304	529	89	5956
Odoratin	13.7	315.086	314.079	[M+H]+, [M+Na]+	C17H14O6	Spectral Library - Bruker NIST 2020 MSMS Spectral Library_hr, Spectral Library - Bruker NIST 2020 MSMS Spectral Library_hr	20210	11.9	0.057	0.18	528.5	0	51255
3-Hydroxy-6,3',4'-trimethoxyflavone	12.94	329.102	328.095	[M+H]+, [M+Na]+	C18H16O6	Spectral Library - Bruker NIST 2020 MSMS Spectral Library_hr, Spectral Library - Bruker NIST 2020 MSMS Spectral Library_hr	20210	1.9	0.063	0.19	526.4	0	155042
Isoguvacine	3.01	128.071	127.063	[M+H]+	C6H9NO2	Spectral Library - Bruker MetaboBASE Personal Library 3.0, Spectral Library - Bruker MetaboBASE Personal Library 3.0	20210	16.8	-0.023	-0.18	524.2	236	5151
3-Amino-3-(4-methylphenyl)propionic acid	12.07	180.102	179.095	[M+H]+	C10H13NO2	Spectral Library - Bruker NIST 2020 MSMS Spectral Library_hr, Spectral Library - Bruker NIST 2020 MSMS Spectral Library_hr	20010	∞	0.224	1.244	519.1	0	1678
Osmundalactone	10.77	129.054	128.047	[M+H]+	C6H8O3	Spectral Library - Bruker MetaboBASE Personal Library 2.0_in-silico, Spectral Library - Bruker MetaboBASE Personal Library 2.0_in-silico, Spectral Library - Bruker MetaboBASE Personal Library 2.0_in-silico	20110	1000	-0.152	-1.182	515.8	711	15435
Nootkatone	12.75	219.174	218.167	[M+H]+	C15H22O	Spectral Library - Bruker NIST 2020 MSMS Spectral Library_hr, Spectral Library - Bruker NIST 2020 MSMS Spectral Library_hr	20210	16.1	-0.064	-0.291	513.9	0	20866
N-Acetyl-3,4-methylenedioxymethcathinone	2.45	250.107	249.1	[M+H]+	C13H15NO4	Spectral Library - Bruker NIST 2020 MSMS Spectral Library_hr, Spectral Library - Bruker NIST 2020 MSMS Spectral Library_hr	20010	∞	-0.049	-0.196	507.3	0	4908
C17-Sphinganine	15.87	288.29	287.282	[M+H]+	C17H37NO2	Spectral Library - MoNA-export-GNPS.msp, Spectral Library - MoNA-export-GNPS.msp	20210	3.9	-0.147	-0.509	505.9	283	12197
2,5-Dihydro-2,4-dimethyloxazole	6.45	100.076	99.0683	[M+H]+	C5H9NO	Spectral Library - Bruker MetaboBASE Personal Library 2.0_in-silico, Spectral Library - Bruker MetaboBASE Personal Library 2.0_in-silico	20210	4.9	-0.067	-0.671	505	665	7446
Actiphenol	10.71	276.123	275.116	[M+H]+, [M+Na]+	C15H17NO4	Spectral Library - Bruker NIST 2020 MSMS Spectral Library_hr, Spectral Library - Bruker NIST 2020 MSMS Spectral Library_hr	20210	19.3	0.147	0.531	504.7	0	5165
